# Supplementary material for: High-Resolution Transcriptomic Analysis of the Adaptive Response of Staphylococcus aureus during Acute and Chronic Phases of Osteomyelitis
Source: PubMed Central journal article supplement — mBio. 2014 Dec 23;5(6):e01775-14. doi: 10.1128/mBio.01775-14 (PMC4278534; doi:10.1128/mbio.01775-14), 2014-12-23
Supplement: mbo006142096st2.pdf [file mbo006142096st2.pdf]

TABLE S2 Raw, RPMK, and re-sampled transcript numbers from *S. aureus* during EX(1-3), AC(1-3) and CH(1-3) conditions

| Gene ID     | Raw values |       |       |      |      |      |      |      |      | RPMK values |      |      |      |      |      |      |      |      | Re-sampled values |      |      |      |      |      |      |      |      |
|-------------|------------|-------|-------|------|------|------|------|------|------|-------------|------|------|------|------|------|------|------|------|-------------------|------|------|------|------|------|------|------|------|
|             | EX_1       | EX_2  | EX_3  | AC_1 | AC_2 | AC_3 | CH_1 | CH_2 | CH_3 | EX_1        | EX_2 | EX_3 | AC_1 | AC_2 | AC_3 | CH_1 | CH_2 | CH_3 | EX_1              | EX_2 | EX_3 | AC_1 | AC_2 | AC_3 | CH_1 | CH_2 | CH_3 |
| RSAU_000001 | 10342      | 5014  | 6281  | 187  | 179  | 333  | 16   | 8    | 10   | 620         | 394  | 645  | 221  | 141  | 167  | 309  | 196  | 276  | 23                | 14   | 23   | 8    | 5    | 6    | 11   | 7    | 10   |
| RSAU_000002 | 6016       | 3118  | 3708  | 164  | 191  | 293  | 15   | 8    | 10   | 476         | 254  | 453  | 233  | 163  | 170  | 346  | 230  | 354  | 14                | 9    | 14   | 178  | 3    | 5    | 11   | 7    | 11   |
| RSAU_000003 | 1220       | 1981  | 1290  | 66   | 114  | 158  | 6    | 10   | 6    | 779         | 895  | 702  | 449  | 516  | 455  | 696  | 1412 | 952  | 5                 | 6    | 5    | 3    | 3    | 3    | 4    | 9    | 6    |
| RSAU_000004 | 9429       | 4570  | 4500  | 119  | 178  | 251  | 12   | 6    | 7    | 692         | 440  | 566  | 172  | 171  | 154  | 283  | 180  | 236  | 21                | 13   | 17   | 5    | 5    | 5    | 8    | 5    | 7    |
| RSAU_000005 | 13715      | 7934  | 8410  | 232  | 333  | 354  | 16   | 10   | 13   | 582         | 442  | 612  | 194  | 197  | 125  | 218  | 174  | 254  | 30                | 23   | 32   | 10   | 10   | 7    | 11   | 9    | 13   |
| RSAU_000006 | 16742      | 11890 | 10505 | 193  | 373  | 395  | 9    | 15   | 5    | 514         | 478  | 552  | 116  | 150  | 101  | 89   | 188  | 70   | 36                | 34   | 39   | 8    | 11   | 7    | 6    | 13   | 9    |
| RSAU_000007 | 2769       | 2331  | 1977  | 250  | 362  | 647  | 30   | 27   | 15   | 278         | 373  | 340  | 512  | 505  | 543  | 971  | 1111 | 694  | 6                 | 8    | 7    | 11   | 11   | 10   | 21   | 24   | 15   |
| RSAU_000008 | 315        | 205   | 176   | 164  | 197  | 320  | 2    | 1    | 0    | 16          | 14   | 16   | 174  | 139  | 144  | 34   | 22   | 0    | 1                 | 1    | 1    | 7    | 6    | 1    | 1    | 0    | 0    |
| RSAU_000009 | 6568       | 5450  | 3602  | 333  | 356  | 365  | 18   | 16   | 6    | 417         | 453  | 391  | 417  | 297  | 193  | 368  | 416  | 175  | 14                | 16   | 13   | 15   | 10   | 7    | 12   | 14   | 6    |
| RSAU_000010 | 403        | 523   | 280   | 34   | 47   | 69   | 1    | 3    | 1    | 47          | 80   | 56   | 78   | 72   | 67   | 37   | 144  | 54   | 1                 | 2    | 1    | 1    | 1    | 1    | 1    | 3    | 1    |
| RSAU_000011 | 183        | 163   | 79    | 15   | 32   | 48   | 0    | 0    | 1    | 45          | 52   | 33   | 73   | 104  | 98   | 0    | 0    | 0    | 0                 | 0    | 0    | 0    | 0    | 0    | 0    | 0    | 0    |
| RSAU_000012 | 1607       | 1555  | 955   | 88   | 91   | 123  | 1    | 7    | 4    | 125         | 183  | 139  | 98   | 89   | 86   | 27   | 241  | 155  | 5                 | 4    | 2    | 2    | 2    | 1    | 1    | 4    | 4    |
| RSAU_000013 | 4271       | 2898  | 2019  | 131  | 223  | 393  | 12   | 2    | 7    | 377         | 336  | 305  | 228  | 259  | 290  | 341  | 72   | 285  | 9                 | 8    | 7    | 6    | 6    | 7    | 8    | 2    | 7    |
| RSAU_000014 | 13759      | 9642  | 9171  | 569  | 759  | 1203 | 22   | 18   | 20   | 571         | 525  | 652  | 466  | 414  | 417  | 294  | 306  | 382  | 30                | 27   | 34   | 25   | 22   | 22   | 15   | 16   | 20   |
| RSAU_000015 | 0          | 0     | 0     | 0    | 0    | 0    | 0    | 0    | 0    | 0           | 0    | 0    | 0    | 0    | 0    | 0    | 0    | 0    | 0                 | 0    | 0    | 0    | 0    | 0    | 0    | 0    | 0    |
| RSAU_000016 | 6565       | 4490  | 3929  | 247  | 388  | 418  | 7    | 5    | 7    | 394         | 343  | 362  | 284  | 297  | 203  | 131  | 119  | 188  | 14                | 13   | 14   | 11   | 11   | 6    | 5    | 4    | 7    |
| RSAU_000017 | 7265       | 5886  | 6510  | 317  | 918  | 1138 | 26   | 16   | 12   | 462         | 491  | 700  | 398  | 768  | 605  | 532  | 417  | 351  | 15                | 17   | 24   | 14   | 26   | 21   | 18   | 14   | 12   |
| RSAU_000018 | 0          | 0     | 0     | 0    | 0    | 0    | 0    | 0    | 0    | 0           | 0    | 0    | 0    | 0    | 0    | 0    | 0    | 0    | 0                 | 0    | 0    | 0    | 0    | 0    | 0    | 0    | 0    |
| RSAU_000019 | 0          | 0     | 0     | 0    | 0    | 0    | 0    | 0    | 0    | 0           | 0    | 0    | 0    | 0    | 0    | 0    | 0    | 0    | 0                 | 0    | 0    | 0    | 0    | 0    | 0    | 0    | 0    |
| RSAU_000020 | 6829       | 5895  | 4364  | 647  | 1005 | 1186 | 45   | 38   | 20   | 794         | 899  | 870  | 1488 | 1538 | 1769 | 1686 | 1812 | 1072 | 15                | 17   | 16   | 28   | 29   | 33   | 31   | 34   | 20   |
| RSAU_000021 | 615        | 3847  | 3423  | 410  | 761  | 1138 | 18   | 17   | 16   | 275         | 225  | 262  | 414  | 447  | 424  | 259  | 313  | 329  | 13                | 11   | 13   | 20   | 22   | 21   | 13   | 15   | 16   |
| RSAU_000022 | 5098       | 3222  | 3225  | 369  | 521  | 673  | 14   | 15   | 4    | 312         | 258  | 338  | 445  | 419  | 344  | 275  | 376  | 112  | 11                | 9    | 12   | 16   | 15   | 12   | 10   | 13   | 4    |
| RSAU_000023 | 3639       | 3480  | 2605  | 191  | 399  | 442  | 13   | 11   | 3    | 376         | 472  | 462  | 390  | 543  | 382  | 433  | 466  | 143  | 8                 | 10   | 10   | 8    | 12   | 8    | 9    | 10   | 3    |
| RSAU_000024 | 461        | 278   | 194   | 23   | 56   | 70   | 2    | 2    | 2    | 47          | 37   | 33   | 46   | 75   | 59   | 65   | 83   | 93   | 1                 | 1    | 1    | 1    | 2    | 1    | 1    | 2    | 2    |
| RSAU_000025 | 396        | 384   | 3465  | 178  | 356  | 158  | 4    | 4    | 200  | 170         | 203  | 143  | 162  | 145  | 145  | 207  | 65   | 0    | 0                 | 0    | 12   | 10   | 12   | 13   | 8    | 10   | 4    |
| RSAU_000026 | 204        | 72    | 68    | 15   | 5    | 15   | 0    | 0    | 0    | 33          | 15   | 19   | 48   | 10   | 20   | 0    | 0    | 0    | 0                 | 0    | 0    | 0    | 0    | 0    | 0    | 0    | 0    |
| RSAU_000027 | 626        | 256   | 186   | 9    | 39   | 21   | 0    | 1    | 4    | 106         | 57   | 54   | 30   | 87   | 29   | 0    | 89   | 313  | 1                 | 1    | 1    | 0    | 1    | 0    | 0    | 1    | 4    |
| RSAU_000028 | 362        | 249   | 275   | 23   | 53   | 29   | 3    | 3    | 0    | 50          | 45   | 65   | 63   | 97   | 33   | 134  | 171  | 0    | 1                 | 1    | 1    | 1    | 2    | 1    | 2    | 3    | 0    |
| RSAU_000029 | 124        | 77    | 83    | 10   | 25   | 20   | 0    | 0    | 0    | 25          | 20   | 29   | 39   | 86   | 33   | 0    | 0    | 0    | 0                 | 0    | 0    | 0    | 0    | 0    | 0    | 0    | 0    |
| RSAU_000030 | 654        | 524   | 549   | 72   | 155  | 142  | 2    | 3    | 2    | 52          | 68   | 75   | 114  | 163  | 95   | 95   | 65   | 111  | 0                 | 0    | 0    | 0    | 0    | 0    | 0    | 0    | 0    |
| RSAU_000031 | 139        | 104   | 67    | 14   | 21   | 21   | 0    | 0    | 0    | 23          | 23   | 19   | 46   | 46   | 29   | 0    | 0    | 0    | 0                 | 0    | 0    | 0    | 0    | 0    | 0    | 0    | 0    |
| RSAU_000032 | 3477       | 2342  | 1476  | 60   | 132  | 216  | 7    | 5    | 10   | 287         | 254  | 209  | 98   | 143  | 149  | 188  | 169  | 381  | 8                 | 7    | 5    | 3    | 4    | 4    | 5    | 4    | 10   |
| RSAU_000033 | 275        | 219   | 119   | 13   | 31   | 25   | 0    | 2    | 1    | 75          | 79   | 56   | 70   | 112  | 57   | 0    | 225  | 126  | 1                 | 1    | 0    | 1    | 1    | 0    | 0    | 2    | 1    |
| RSAU_000034 | 216        | 155   | 116   | 6    | 65   | 28   | 1    | 2    | 4    | 14          | 13   | 13   | 23   | 27   | 36   | 107  | 54   | 0    | 0                 | 0    | 0    | 0    | 0    | 0    | 0    | 0    | 0    |
| RSAU_000035 | 77         | 38    | 27    | 5    | 5    | 13   | 0    | 0    | 0    | 11          | 7    | 6    | 14   | 9    | 16   | 0    | 0    | 0    | 0                 | 0    | 0    | 0    | 0    | 0    | 0    | 0    | 0    |
| RSAU_000036 | 288        | 199   | 167   | 27   | 40   | 32   | 2    | 2    | 0    | 27          | 24   | 27   | 50   | 49   | 25   | 61   | 77   | 0    | 1                 | 1    | 1    | 1    | 1    | 1    | 1    | 2    | 0    |
| RSAU_000037 | 290        | 186   | 194   | 14   | 18   | 30   | 0    | 0    | 0    | 51          | 43   | 58   | 48   | 41   | 44   | 0    | 0    | 0    | 0                 | 0    | 0    | 0    | 0    | 0    | 0    | 0    | 0    |
| RSAU_000038 | 852        | 762   | 941   | 277  | 383  | 592  | 26   | 20   | 7    | 76          | 89   | 122  | 488  | 448  | 441  | 747  | 731  | 287  | 2                 | 2    | 3    | 12   | 11   | 11   | 18   | 18   | 7    |
| RSAU_000039 | 346        | 187   | 255   | 33   | 44   | 50   | 3    | 1    | 4    | 50          | 36   | 44   | 98   | 84   | 38   | 0    | 0    | 0    | 0                 | 0    | 0    | 0    | 0    | 0    | 0    | 0    | 0    |
| RSAU_000040 | 1479       | 1379  | 947   | 52   | 73   | 120  | 5    | 1    | 4    | 163         | 200  | 179  | 113  | 106  | 111  | 178  | 45   | 203  | 3                 | 4    | 3    | 2    | 2    | 2    | 4    | 1    | 4    |
| RSAU_000041 | 555        | 405   | 308   | 10   | 34   | 18   | 0    | 0    | 0    | 83          | 89   | 89   | 33   | 75   | 25   | 0    | 0    | 0    | 0                 | 0    | 0    | 0    | 0    | 0    | 0    | 0    | 0    |
| RSAU_000042 | 300        | 549   | 287   | 112  | 211  | 335  | 43   | 13   | 44   | 24          | 37   | 40   | 183  | 223  | 231  | 1146 | 441  | 1677 | 1                 | 1    | 1    | 5    | 6    | 6    | 30   | 12   | 44   |
| RSAU_000043 | 76         | 46    | 46    | 5    | 7    | 6    | 0    | 0    | 0    | 9           | 6    | 9    | 16   | 9    | 16   | 9    | 16   | 9    | 0                 | 0    | 0    | 0    | 0    | 0    | 0    | 0    | 0    |
| RSAU_000044 | 129        | 79    | 127   | 10   | 18   | 0    | 0    | 0    | 0    | 2           | 13   | 11   | 13   | 27   | 13   | 0    | 0    | 0    | 0                 | 0    | 0    | 0    | 0    | 0    | 0    | 0    | 0    |
| RSAU_000045 | 174        | 149   | 137   | 22   | 33   | 42   | 0    | 3    | 0    | 18          | 20   | 24   | 46   | 46   | 37   | 0    | 130  | 0    | 0                 | 0    | 0    | 1    | 1    | 1    | 1    | 0    | 3    |
| RSAU_000046 | 386        | 285   | 272   | 19   | 18   | 44   | 0    | 3    | 0    | 40          | 39   | 49   | 39   | 25   | 38   | 0    | 130  | 0    | 1                 | 1    | 1    | 1    | 1    | 1    | 0    | 3    | 0    |
| RSAU_000047 | 126        | 80    | 72    | 3    | 6    | 0    | 0    | 0    | 1    | 57          | 47   | 56   | 26   | 35   | 0    | 0    | 209  | 0    | 0                 | 0    | 0    | 0    | 0    | 0    | 0    | 0    | 0    |
| RSAU_000048 | 897        | 625   | 654   | 54   | 102  | 159  | 2    | 1    | 0    | 66          | 66   | 73   | 98   | 98   | 97   | 111  | 60   | 271  | 1                 | 0    | 0    | 2    | 2    | 2    | 3    | 4    | 0    |
| RSAU_000049 | 138        | 77    | 70    | 21   | 33   | 32   | 2    | 1    | 1    | 34          | 25   | 29   | 102  | 107  | 66   | 159  | 101  | 114  | 0                 | 0    | 0    | 0    | 1    | 1    | 1    | 1    | 1    |
| RSAU_000050 | 10         | 2     | 5     | 0    | 0    | 0    | 0    | 0    | 0    | 1           | 5    | 1    | 4    | 0    | 0    | 0    | 0    | 0    | 0                 | 0    | 0    | 0    | 0    | 0    | 0    | 0    | 0    |
| RSAU_000051 | 3123       | 2658  | 2034  | 62   | 121  | 174  | 3    | 0    | 0    | 114         | 127  | 127  | 44   | 58   | 53   | 35   | 0    | 16   | 7                 | 8    | 8    | 3    | 3    | 3    | 2    | 0    | 1    |
| RSAU_000052 | 180        | 155   | 116   | 10   | 25   | 23   | 0    | 0    | 0    | 25          | 23   | 13   | 13   | 16   | 0    | 0    | 0    | 0    | 0                 | 0    | 0    | 0    | 0    | 0    | 0    | 0    | 0    |
| RSAU_000053 | 308        | 232   | 263   | 6    | 15   | 30   | 0    | 1    | 1    | 18          | 17   | 26   | 6    | 11   | 14   | 0    | 24   | 27   | 1                 | 1    | 1    | 0    | 0    | 0    | 0    | 0    | 1    |
| RSAU_000054 | 4505       | 2101  | 1743  | 320  | 371  | 787  | 14   | 9    | 6    | 220         | 134  | 146  | 309  | 239  | 322  | 220  | 180  | 135  | 10                | 6    | 7    | 14   | 11   | 14   | 10   | 8    | 6    |
| RSAU_000055 | 1882       | 1294  | 1492  | 1127 | 1522 | 1706 | 36   | 33   | 54   | 77          | 78   | 117  | 1023 | 921  | 656  | 533  | 622  | 1144 | 4                 | 4    | 5    | 48   | 44   | 31   | 25   | 29   | 54   |
| RSAU_000056 | 559        | 308   | 233   | 39   | 40   | 107  | 0    | 1    | 4    | 96          | 69   | 68   | 132  | 90   | 154  | 0    | 70   | 317  | 1                 | 1    | 1    | 2    | 1    | 2    | 0    | 1    | 4    |
| RSAU_000057 | 1824       | 2305  | 1680  | 61   | 40   | 116  | 30   | 1    | 0    | 230         | 165  | 167  | 61   | 110  | 50   | 49   | 63   | 0    | 10                | 0    | 0    | 0    | 0    | 0    | 0    | 0    | 0    |
| RSAU_000058 | 2391       | 843   | 774   | 34   | 43   | 91   | 5    | 1    | 0    | 259         | 119  | 143  | 72   | 61   | 82   | 174  | 44   | 0    | 5                 | 2    | 3    | 1    | 2    | 3    | 1    | 0    | 0    |
| RSAU_000059 | 1961       | 6     |       |      |      |      |      |      |      |             |      |      |      |      |      |      |      |      |                   |      |      |      |      |      |      |      |      |

|             |        |        |        |      |      |      |    |    |    |      |       |       |      |      |      |      |      |      |     |      |     |     |    |    |    |    |    |    |    |
|-------------|--------|--------|--------|------|------|------|----|----|----|------|-------|-------|------|------|------|------|------|------|-----|------|-----|-----|----|----|----|----|----|----|----|
| RSAU_000153 | 706    | 572    | 515    | 32   | 21   | 42   | 2  | 0  | 0  | 28   | 30    | 35    | 25   | 11   | 14   | 26   | 0    | 0    | 2   | 2    | 2   | 2   | 1  | 1  | 1  | 1  | 1  | 0  | 0  |
| RSAU_000154 | 1476   | 1122   | 888    | 89   | 159  | 278  | 8  | 3  | 5  | 155  | 155   | 160   | 185  | 220  | 245  | 271  | 129  | 243  | 3   | 3    | 3   | 3   | 4  | 5  | 5  | 6  | 3  | 5  |    |
| RSAU_000155 | 1453   | 1567   | 1433   | 156  | 276  | 558  | 14 | 17 | 4  | 197  | 209   | 170   | 42   | 17   | 11   | 0    | 0    | 473  | 5   | 3    | 5   | 2   | 1  | 0  | 10 | 16 | 15 | 4  |    |
| RSAU_000156 | 331    | 351    | 282    | 201  | 331  | 579  | 14 | 13 | 0  | 46   | 64    | 68    | 559  | 614  | 683  | 636  | 751  | 0    | 1   | 1    | 1   | 9   | 10 | 10 | 10 | 11 | 0  | 0  |    |
| RSAU_000157 | 55     | 62     | 35     | 16   | 10   | 23   | 1  | 4  | 0  | 4    | 6     | 4     | 23   | 9    | 14   | 23   | 121  | 0    | 0   | 0    | 0   | 0   | 0  | 0  | 1  | 4  | 0  | 0  |    |
| RSAU_000158 | 66     | 78     | 49     | 1    | 9    | 5    | 0  | 0  | 0  | 4    | 6     | 5     | 1    | 7    | 2    | 0    | 0    | 0    | 0   | 0    | 0   | 0   | 0  | 0  | 0  | 0  | 0  | 0  |    |
| RSAU_000159 | 220    | 137    | 130    | 7    | 22   | 10   | 0  | 0  | 0  | 14   | 11    | 14    | 6    | 20   | 17   | 41   | 26   | 0    | 0   | 0    | 0   | 0   | 0  | 0  | 0  | 0  | 0  | 0  |    |
| RSAU_000160 | 89     | 65     | 100    | 3    | 11   | 22   | 0  | 0  | 0  | 8    | 16    | 5     | 14   | 17   | 0    | 0    | 0    | 0    | 0   | 0    | 0   | 0   | 0  | 0  | 0  | 0  | 0  | 0  |    |
| RSAU_000161 | 214    | 161    | 282    | 17   | 45   | 54   | 5  | 2  | 2  | 16   | 15    | 36    | 25   | 44   | 34   | 121  | 62   | 69   | 0   | 0    | 1   | 1   | 1  | 1  | 4  | 2  | 2  | 0  |    |
| RSAU_000162 | 295    | 254    | 338    | 35   | 52   | 100  | 2  | 4  | 1  | 23   | 26    | 45    | 54   | 53   | 65   | 50   | 128  | 36   | 4   | 1    | 1   | 1   | 2  | 1  | 4  | 2  | 1  | 0  |    |
| RSAU_000163 | 169    | 161    | 276    | 21   | 42   | 37   | 1  | 1  | 0  | 14   | 17    | 39    | 34   | 46   | 26   | 27   | 34   | 0    | 0   | 0    | 0   | 1   | 1  | 1  | 1  | 1  | 1  | 0  |    |
| RSAU_000164 | 1423   | 969    | 604    | 13   | 8    | 6    | 0  | 0  | 0  | 234  | 209   | 170   | 42   | 17   | 11   | 0    | 0    | 0    | 0   | 0    | 0   | 0   | 0  | 0  | 0  | 0  | 0  | 0  |    |
| RSAU_000165 | 173    | 191    | 290    | 16   | 26   | 52   | 0  | 0  | 0  | 3    | 10    | 14    | 29   | 18   | 20   | 25   | 0    | 48   | 81  | 0    | 1   | 1   | 1  | 1  | 1  | 0  | 2  | 3  |    |
| RSAU_000166 | 203    | 124    | 100    | 8    | 18   | 19   | 0  | 0  | 0  | 4    | 21    | 17    | 18   | 13   | 25   | 17   | 0    | 198  | 0   | 0    | 0   | 0   | 0  | 0  | 0  | 0  | 0  | 0  |    |
| RSAU_000168 | 384    | 285    | 210    | 33   | 33   | 45   | 0  | 3  | 2  | 20   | 19    | 18    | 34   | 22   | 19   | 0    | 64   | 48   | 1   | 1    | 1   | 1   | 1  | 1  | 1  | 0  | 3  | 2  |    |
| RSAU_000169 | 166    | 97     | 77     | 20   | 14   | 41   | 1  | 1  | 2  | 13   | 10    | 11    | 33   | 15   | 28   | 27   | 94   | 77   | 0   | 0    | 0   | 0   | 0  | 0  | 1  | 0  | 1  | 2  |    |
| RSAU_000170 | 5163   | 7303   | 9517   | 590  | 1411 | 1113 | 71 | 57 | 82 | 187  | 351   | 592   | 387  | 677  | 337  | 837  | 849  | 1036 | 11  | 21   | 35  | 23  | 41 | 20 | 49 | 51 | 62 | 0  |    |
| RSAU_000171 | 1306   | 2714   | 4643   | 396  | 1306 | 1188 | 59 | 56 | 82 | 143  | 384   | 850   | 844  | 1856 | 1073 | 2053 | 2480 | 4081 | 3   | 8    | 17  | 17  | 37 | 21 | 41 | 50 | 82 | 0  |    |
| RSAU_000172 | 527    | 459    | 341    | 37   | 51   | 74   | 2  | 3  | 0  | 34   | 39    | 38    | 48   | 44   | 40   | 42   | 81   | 0    | 1   | 1    | 1   | 1   | 2  | 1  | 1  | 1  | 3  | 0  |    |
| RSAU_000173 | 36     | 14     | 12     | 1    | 0    | 1    | 0  | 2  | 0  | 16   | 8     | 9     | 9    | 0    | 3    | 0    | 378  | 0    | 0   | 0    | 0   | 0   | 0  | 0  | 0  | 0  | 2  | 0  |    |
| RSAU_000174 | 162    | 101    | 72     | 40   | 45   | 106  | 2  | 1  | 0  | 38   | 31    | 29    | 187  | 143  | 208  | 152  | 97   | 0    | 0   | 0    | 0   | 0   | 2  | 1  | 2  | 1  | 0  | 0  |    |
| RSAU_000175 | 3422   | 2559   | 2892   | 489  | 637  | 986  | 6  | 6  | 5  | 157  | 154   | 228   | 445  | 386  | 380  | 89   | 113  | 106  | 7   | 7    | 11  | 21  | 18 | 18 | 4  | 5  | 5  | 0  |    |
| RSAU_000176 | 321    | 259    | 198    | 46   | 68   | 74   | 0  | 0  | 0  | 22   | 23    | 23    | 62   | 61   | 42   | 0    | 0    | 0    | 1   | 1    | 1   | 1   | 2  | 2  | 1  | 0  | 0  | 0  |    |
| RSAU_000177 | 161    | 111    | 100    | 43   | 47   | 100  | 0  | 0  | 0  | 5    | 5     | 6     | 30   | 22   | 30   | 0    | 0    | 0    | 0   | 0    | 0   | 0   | 2  | 1  | 2  | 0  | 0  | 0  |    |
| RSAU_000178 | 31     | 31     | 26     | 28   | 69   | 37   | 0  | 0  | 0  | 2    | 2     | 4     | 37   | 61   | 0    | 20   | 0    | 0    | 0   | 0    | 0   | 0   | 0  | 1  | 0  | 0  | 0  | 0  |    |
| RSAU_000179 | 107    | 90     | 86     | 89   | 62   | 118  | 0  | 1  | 0  | 5    | 6     | 7     | 95   | 58   | 53   | 0    | 22   | 0    | 0   | 0    | 0   | 0   | 2  | 2  | 0  | 1  | 0  | 0  |    |
| RSAU_000180 | 125    | 112    | 94     | 419  | 368  | 656  | 3  | 6  | 0  | 6    | 7     | 8     | 429  | 251  | 285  | 50   | 127  | 0    | 0   | 0    | 0   | 0   | 18 | 11 | 12 | 2  | 5  | 0  |    |
| RSAU_000181 | 917    | 924    | 574    | 32   | 48   | 86   | 0  | 0  | 0  | 4    | 60    | 80    | 65   | 41   | 41   | 47   | 0    | 163  | 122 | 2    | 3   | 2   | 1  | 1  | 2  | 0  | 5  | 4  |    |
| RSAU_000182 | 781    | 854    | 1006   | 210  | 280  | 328  | 7  | 6  | 3  | 45   | 64    | 99    | 239  | 212  | 198  | 130  | 142  | 79   | 2   | 2    | 4   | 9   | 8  | 6  | 5  | 5  | 3  | 0  |    |
| RSAU_000183 | 395    | 342    | 305    | 83   | 395  | 426  | 7  | 4  | 1  | 69   | 102   | 199   | 317  | 420  | 375  | 105  | 375  | 105  | 3   | 1    | 1   | 1   | 2  | 1  | 2  | 4  | 1  | 1  |    |
| RSAU_000184 | 31     | 41     | 50     | 24   | 24   | 36   | 0  | 0  | 0  | 0    | 14    | 25    | 40   | 222  | 145  | 141  | 0    | 0    | 0   | 0    | 0   | 0   | 0  | 1  | 1  | 0  | 0  | 0  |    |
| RSAU_000185 | 2045   | 2624   | 4204   | 1274 | 1482 | 1697 | 62 | 41 | 18 | 145  | 245   | 518   | 1793 | 1389 | 1011 | 1423 | 1197 | 591  | 5   | 7    | 16  | 54  | 42 | 31 | 43 | 36 | 18 | 0  |    |
| RSAU_000186 | 252169 | 417874 | 165705 | 795  | 1759 | 1454 | 43 | 60 | 88 | 2199 | 46940 | 24319 | 1344 | 1981 | 1041 | 1186 | 2105 | 3471 | 548 | 1187 | 614 | 34  | 51 | 26 | 30 | 53 | 88 | 0  |    |
| RSAU_000187 | 3206   | 1713   | 1724   | 45   | 48   | 135  | 5  | 3  | 4  | 171  | 119   | 157   | 47   | 33   | 80   | 85   | 65   | 98   | 7   | 5    | 6   | 2   | 1  | 2  | 3  | 3  | 4  | 0  |    |
| RSAU_000188 | 526    | 394    | 368    | 47   | 1    | 46   | 45 | 0  | 0  | 45   | 45    | 45    | 45   | 45   | 45   | 45   | 45   | 45   | 0   | 0    | 0   | 0   | 0  | 0  | 0  | 0  | 0  | 0  |    |
| RSAU_000189 | 211    | 128    | 145    | 30   | 24   | 93   | 0  | 3  | 0  | 8    | 6     | 9     | 23   | 12   | 30   | 0    | 47   | 0    | 0   | 0    | 0   | 1   | 1  | 1  | 2  | 0  | 3  | 0  |    |
| RSAU_000190 | 35     | 19     | 18     | 1    | 10   | 10   | 0  | 1  | 0  | 6    | 4     | 5     | 3    | 22   | 14   | 0    | 71   | 0    | 0   | 0    | 0   | 0   | 0  | 0  | 0  | 0  | 1  | 0  |    |
| RSAU_000191 | 35     | 22     | 9      | 0    | 4    | 13   | 0  | 0  | 0  | 10   | 8     | 4     | 0    | 15   | 31   | 0    | 120  | 0    | 0   | 0    | 0   | 0   | 0  | 0  | 0  | 0  | 1  | 0  |    |
| RSAU_000192 | 169    | 117    | 99     | 13   | 64   | 26   | 0  | 0  | 0  | 10   | 9     | 11    | 16   | 11   | 14   | 0    | 9    | 0    | 0   | 0    | 0   | 0   | 0  | 0  | 0  | 0  | 0  | 0  | 0  |
| RSAU_000193 | 260    | 182    | 149    | 27   | 29   | 43   | 0  | 3  | 0  | 20   | 18    | 19    | 41   | 29   | 27   | 0    | 95   | 0    | 1   | 1    | 1   | 1   | 1  | 1  | 1  | 0  | 3  | 0  |    |
| RSAU_000194 | 258    | 228    | 170    | 15   | 47   | 25   | 1  | 0  | 1  | 20   | 23    | 22    | 23   | 48   | 16   | 25   | 0    | 36   | 1   | 1    | 1   | 1   | 1  | 1  | 0  | 1  | 0  | 1  |    |
| RSAU_000195 | 2532   | 2224   | 1997   | 209  | 311  | 538  | 11 | 9  | 1  | 288  | 332   | 389   | 470  | 466  | 512  | 403  | 420  | 52   | 5   | 6    | 7   | 9   | 9  | 10 | 8  | 8  | 1  | 0  |    |
| RSAU_000196 | 2237   | 1774   | 1441   | 130  | 116  | 199  | 5  | 9  | 0  | 178  | 185   | 196   | 204  | 123  | 132  | 128  | 261  | 183  | 5   | 5    | 6   | 3   | 4  | 4  | 4  | 7  | 5  | 0  |    |
| RSAU_000197 | 1027   | 1141   | 1028   | 102  | 102  | 102  | 0  | 0  | 0  | 102  | 102   | 102   | 102  | 102  | 102  | 102  | 102  | 102  | 0   | 0    | 0   | 0   | 0  | 0  | 0  | 0  | 0  | 0  | 0  |
| RSAU_000198 | 3069   | 2634   | 2504   | 254  | 252  | 396  | 2  | 3  | 10 | 214  | 241   | 290   | 350  | 231  | 231  | 44   | 85   | 321  | 7   | 8    | 9   | 11  | 7  | 7  | 1  | 3  | 10 | 0  |    |
| RSAU_000199 | 2248   | 1544   | 1552   | 256  | 302  | 411  | 11 | 4  | 4  | 256  | 230   | 303   | 575  | 452  | 381  | 403  | 186  | 209  | 5   | 4    | 6   | 11  | 9  | 7  | 8  | 4  | 4  | 0  |    |
| RSAU_000200 | 3573   | 2143   | 2438   | 290  | 261  | 418  | 1  | 1  | 4  | 284  | 223   | 332   | 455  | 273  | 278  | 25   | 97   | 146  | 8   | 6    | 9   | 12  | 7  | 8  | 1  | 3  | 4  | 0  |    |
| RSAU_000201 | 1322   | 924    | 809    | 67   | 71   | 96   | 22 | 25 | 21 | 596  | 559   | 672   | 578  | 453  | 388  | 388  | 465  | 467  | 16  | 15   | 16  | 22  | 17 | 15 | 22 | 21 | 2  | 0  |    |
| RSAU_000202 | 17454  | 14941  | 14655  | 691  | 1033 | 1277 | 33 | 16 | 11 | 828  | 929   | 1191  | 647  | 644  | 506  | 504  | 311  | 240  | 38  | 43   | 54  | 30  | 29 | 23 | 23 | 14 | 11 | 0  |    |
| RSAU_000203 | 0      | 0      | 0      | 0    | 0    | 0    | 0  | 0  | 0  | 0    | 0     | 0     | 0    | 0    | 0    | 0    | 0    | 0    | 0   | 0    | 0   | 0   | 0  | 0  | 0  | 0  | 0  | 0  | 0  |
| RSAU_000204 | 111    | 62     | 56     | 6    | 4    | 1    | 0  | 0  | 0  | 16   | 12    | 14    | 18   | 8    | 1    | 0    | 0    | 0    | 0   | 0    | 0   | 0   | 0  | 0  | 0  | 0  | 0  | 0  | 0  |
| RSAU_000205 | 0      | 0      | 0      | 0    | 0    | 0    | 0  | 0  | 0  | 0    | 0     | 0     | 0    | 0    | 0    | 0    | 0    | 0    | 0   | 0    | 0   | 0   | 0  | 0  | 0  | 0  | 0  | 0  | 0  |
| RSAU_000206 | 1623   | 3426   | 2913   | 128  | 221  | 335  | 15 | 10 | 0  | 1963 | 543   | 553   | 305  | 351  | 339  | 652  | 793  | 836  | 3   | 3    | 4   | 5   | 6  | 6  | 6  | 6  | 15 | 14 | 15 |
| RSAU_000207 | 2381   | 1877   | 1599   | 71   | 146  | 215  | 10 | 9  | 2  | 110  | 114   | 127   | 65   | 89   | 83   | 149  | 171  | 42   | 5   | 5    | 6   | 3   | 4  | 4  | 7  | 8  | 2  | 0  | 0  |
| RSAU_000208 | 247    | 188    | 149    | 7    | 20   | 28   | 6  | 0  | 0  | 17   | 27    | 27    | 28   | 15   | 29   | 25   | 213  | 90   | 50  | 1    | 1   | 1   | 1  | 1  | 1  | 4  | 2  | 1  | 0  |
| RSAU_000209 | 6836   | 2995   | 599    | 11   | 15   | 49   | 4  | 4  | 4  | 1275 | 732   | 191   | 40   | 36   | 76   | 240  | 305  | 343  | 15  | 9    | 2   | 0   | 0  | 1  | 3  | 4  | 4  | 0  |    |
| RSAU_000210 | 9186   | 5386   | 1742   | 63   | 91   | 62   | 0  | 0  | 0  | 952  | 822   | 347   | 578  | 453  | 388  | 465  | 467  | 16   | 15  | 16   | 22  | 337 | 37 | 4  | 6  | 6  | 9  | 0  |    |
| RSAU_000211 | 1165   | 956    | 371    | 41   | 26   | 117  | 2  | 5  | 2  | 135  | 55    | 73    | 93   | 39   | 113  | 74   | 237  | 106  | 2   | 1    | 1   | 2   | 1  | 2  | 1  | 4  | 2  | 0  |    |
| RSAU_000212 | 176    | 119    | 54     | 1    | 0    | 11   | 1  | 0  | 5  | 18   | 16    | 9     | 2    | 0    | 9    |      |      |      |     |      |     |     |    |    |    |    |    |    |    |



|              |        |        |        |      |      |      |     |    |    |       |       |       |      |      |       |      |      |      |     |     |     |    |    |    |    |    |    |   |   |
|--------------|--------|--------|--------|------|------|------|-----|----|----|-------|-------|-------|------|------|-------|------|------|------|-----|-----|-----|----|----|----|----|----|----|---|---|
| RSAAU_000455 | 2135   | 1813   | 1381   | 36   | 56   | 77   | 7   | 5  | 0  | 365   | 407   | 405   | 121  | 110  | 55    | 350  | 0    | 5    | 5   | 5   | 2   | 2  | 1  | 1  | 1  | 1  | 4  | 0 |   |
| RSAAU_000456 | 18129  | 15019  | 12506  | 550  | 618  | 963  | 23  | 21 | 20 | 995   | 1081  | 1176  | 596  | 446  | 442   | 406  | 472  | 505  | 40  | 43  | 46  | 24 | 17 | 18 | 16 | 19 | 20 | 0 |   |
| RSAAU_000457 | 0      | 0      | 0      | 0    | 0    | 0    | 0   | 0  | 0  | 0     | 0     | 0     | 0    | 0    | 0     | 0    | 0    | 0    | 0   | 0   | 0   | 0  | 0  | 0  | 0  | 0  | 0  | 0 |   |
| RSAAU_000458 | 0      | 0      | 0      | 0    | 0    | 0    | 0   | 0  | 0  | 0     | 0     | 0     | 0    | 0    | 0     | 0    | 0    | 0    | 0   | 0   | 0   | 0  | 0  | 0  | 0  | 0  | 0  | 0 |   |
| RSAAU_000459 | 0      | 0      | 0      | 0    | 0    | 0    | 0   | 0  | 0  | 0     | 0     | 0     | 0    | 0    | 0     | 0    | 0    | 0    | 0   | 0   | 0   | 0  | 0  | 0  | 0  | 0  | 0  | 0 |   |
| RSAAU_000460 | 0      | 0      | 0      | 0    | 0    | 0    | 0   | 0  | 0  | 0     | 0     | 0     | 0    | 0    | 0     | 0    | 0    | 0    | 0   | 0   | 0   | 0  | 0  | 0  | 0  | 0  | 0  | 0 |   |
| RSAAU_000461 | 0      | 0      | 0      | 0    | 0    | 0    | 0   | 0  | 0  | 0     | 0     | 0     | 0    | 0    | 0     | 0    | 0    | 0    | 0   | 0   | 0   | 0  | 0  | 0  | 0  | 0  | 0  | 0 |   |
| RSAAU_000462 | 0      | 0      | 0      | 0    | 0    | 0    | 0   | 0  | 0  | 0     | 0     | 0     | 0    | 0    | 0     | 0    | 0    | 0    | 0   | 0   | 0   | 0  | 0  | 0  | 0  | 0  | 0  | 0 |   |
| RSAAU_000463 | 0      | 0      | 0      | 0    | 0    | 0    | 0   | 0  | 0  | 0     | 0     | 0     | 0    | 0    | 0     | 0    | 0    | 0    | 0   | 0   | 0   | 0  | 0  | 0  | 0  | 0  | 0  | 0 |   |
| RSAAU_000464 | 0      | 0      | 0      | 0    | 0    | 0    | 0   | 0  | 0  | 0     | 0     | 0     | 0    | 0    | 0     | 0    | 0    | 0    | 0   | 0   | 0   | 0  | 0  | 0  | 0  | 0  | 0  | 0 |   |
| RSAAU_000465 | 0      | 0      | 0      | 0    | 0    | 0    | 0   | 0  | 0  | 0     | 0     | 0     | 0    | 0    | 0     | 0    | 0    | 0    | 0   | 0   | 0   | 0  | 0  | 0  | 0  | 0  | 0  | 0 |   |
| RSAAU_000466 | 0      | 0      | 0      | 0    | 0    | 0    | 0   | 0  | 0  | 0     | 0     | 0     | 0    | 0    | 0     | 0    | 0    | 0    | 0   | 0   | 0   | 0  | 0  | 0  | 0  | 0  | 0  | 0 |   |
| RSAAU_000467 | 0      | 0      | 0      | 0    | 0    | 0    | 0   | 0  | 0  | 0     | 0     | 0     | 0    | 0    | 0     | 0    | 0    | 0    | 0   | 0   | 0   | 0  | 0  | 0  | 0  | 0  | 0  | 0 |   |
| RSAAU_000468 | 0      | 0      | 0      | 0    | 0    | 0    | 0   | 0  | 0  | 0     | 0     | 0     | 0    | 0    | 0     | 0    | 0    | 0    | 0   | 0   | 0   | 0  | 0  | 0  | 0  | 0  | 0  | 0 |   |
| RSAAU_000469 | 188    | 135    | 164    | 5    | 15   | 15   | 0   | 0  | 0  | 11    | 10    | 16    | 5    | 11   | 7     | 0    | 0    | 0    | 0   | 0   | 0   | 0  | 0  | 0  | 0  | 0  | 0  | 0 |   |
| RSAAU_000470 | 21212  | 12538  | 10966  | 18   | 26   | 41   | 0   | 2  | 0  | 1851  | 1513  | 1587  | 32   | 126  | 31    | 0    | 0    | 0    | 0   | 0   | 0   | 0  | 0  | 0  | 0  | 0  | 0  | 0 |   |
| RSAAU_000471 | 13349  | 6915   | 4726   | 8    | 8    | 8    | 0   | 0  | 0  | 1944  | 1300  | 1180  | 23   | 15   | 20    | 46   | 0    | 0    | 0   | 0   | 0   | 0  | 0  | 0  | 0  | 0  | 0  | 0 |   |
| RSAAU_000472 | 3221   | 1494   | 973    | 167  | 185  | 389  | 10  | 5  | 6  | 216   | 131   | 112   | 221  | 163  | 216   | 216  | 137  | 185  | 7   | 4   | 3   | 7  | 5  | 7  | 7  | 4  | 6  | 0 |   |
| RSAAU_000473 | 1147   | 886    | 1271   | 138  | 226  | 549  | 20  | 13 | 7  | 202   | 205   | 385   | 481  | 525  | 811   | 1139 | 942  | 570  | 2   | 3   | 5   | 6  | 6  | 10 | 14 | 12 | 7  | 0 |   |
| RSAAU_000474 | 1701   | 1039   | 1353   | 267  | 422  | 719  | 22  | 18 | 22 | 245   | 196   | 334   | 759  | 799  | 866   | 1021 | 1062 | 1460 | 4   | 3   | 5   | 11 | 12 | 13 | 15 | 16 | 22 | 0 |   |
| RSAAU_000475 | 2547   | 1501   | 2622   | 397  | 613  | 925  | 26  | 40 | 26 | 235   | 169   | 363   | 633  | 651  | 624   | 676  | 1324 | 1042 | 6   | 5   | 10  | 17 | 17 | 17 | 18 | 36 | 26 | 0 |   |
| RSAAU_000476 | 6897   | 6064   | 7914   | 1284 | 2281 | 2425 | 107 | 93 | 54 | 239   | 276   | 471   | 880  | 1042 | 704   | 1197 | 1323 | 863  | 15  | 17  | 30  | 55 | 65 | 44 | 75 | 83 | 54 | 0 |   |
| RSAAU_000477 | 21338  | 21910  | 18900  | 1576 | 2296 | 4521 | 45  | 64 | 25 | 1277  | 1720  | 1938  | 1862 | 1807 | 2262  | 867  | 1569 | 689  | 46  | 63  | 70  | 67 | 86 | 82 | 31 | 57 | 25 | 0 |   |
| RSAAU_000478 | 7503   | 5166   | 6015   | 430  | 655  | 1117 | 20  | 8  | 5  | 570   | 561   | 784   | 645  | 655  | 710   | 490  | 249  | 175  | 16  | 16  | 22  | 18 | 19 | 20 | 14 | 7  | 5  | 0 |   |
| RSAAU_000479 | 6336   | 4194   | 3571   | 83   | 203  | 194  | 8   | 16 | 18 | 355   | 309   | 343   | 82   | 146  | 91    | 126  | 194  | 413  | 14  | 12  | 13  | 4  | 6  | 4  | 5  | 7  | 16 | 0 |   |
| RSAAU_000480 | 2366   | 1306   | 2381   | 236  | 477  | 793  | 18  | 18 | 11 | 347   | 381   | 547   | 671  | 791  | 835   | 730  | 630  | 638  | 6   | 9   | 10  | 14 | 15 | 13 | 16 | 11 | 4  | 0 |   |
| RSAAU_000481 | 5740   | 4255   | 4561   | 559  | 824  | 1085 | 18  | 17 | 6  | 334   | 325   | 455   | 643  | 632  | 529   | 338  | 406  | 161  | 12  | 12  | 17  | 24 | 24 | 20 | 13 | 15 | 6  | 0 |   |
| RSAAU_000482 | 1640   | 1240   | 1326   | 188  | 361  | 469  | 10  | 5  | 3  | 330   | 328   | 458   | 748  | 958  | 791   | 649  | 413  | 278  | 4   | 4   | 5   | 8  | 10 | 9  | 7  | 4  | 3  | 0 |   |
| RSAAU_000483 | 3139   | 2081   | 2141   | 201  | 318  | 365  | 5   | 1  | 3  | 343   | 298   | 401   | 433  | 457  | 333   | 176  | 44   | 151  | 7   | 6   | 8   | 9  | 9  | 7  | 4  | 1  | 3  | 0 |   |
| RSAAU_000484 | 1175   | 2029   | 153    | 293  | 237  | 8    | 4   | 0  | 0  | 175   | 307   | 54    | 477  | 597  | 305   | 36   | 5    | 288  | 5   | 0   | 0   | 0  | 0  | 0  | 0  | 0  | 0  | 0 | 0 |
| RSAAU_000485 | 1193   | 533    | 573    | 21   | 372  | 63   | 4   | 0  | 0  | 141   | 100   | 140   | 144  | 155  | 75    | 184  | 0    | 0    | 3   | 2   | 2   | 2  | 2  | 1  | 3  | 0  | 0  | 0 |   |
| RSAAU_000486 | 0      | 0      | 0      | 0    | 0    | 0    | 0   | 0  | 0  | 0     | 0     | 0     | 0    | 0    | 0     | 0    | 0    | 0    | 0   | 0   | 0   | 0  | 0  | 0  | 0  | 0  | 0  | 0 | 0 |
| RSAAU_000487 | 4445   | 3998   | 3504   | 350  | 518  | 906  | 26  | 24 | 23 | 1984  | 2341  | 2680  | 3084 | 3042 | 3381  | 3738 | 4391 | 4729 | 10  | 12  | 13  | 15 | 16 | 18 | 21 | 23 | 0  | 0 |   |
| RSAAU_000488 | 11692  | 8134   | 7587   | 761  | 1331 | 2195 | 66  | 53 | 44 | 1740  | 1587  | 1934  | 2235 | 2606 | 2731  | 3163 | 3232 | 3015 | 25  | 23  | 28  | 33 | 38 | 40 | 46 | 47 | 44 | 0 |   |
| RSAAU_000489 | 0      | 0      | 0      | 0    | 0    | 0    | 0   | 0  | 0  | 0     | 0     | 0     | 0    | 0    | 0     | 0    | 0    | 0    | 0   | 0   | 0   | 0  | 0  | 0  | 0  | 0  | 0  | 0 | 0 |
| RSAAU_000490 | 0      | 0      | 0      | 0    | 0    | 0    | 0   | 0  | 0  | 0     | 0     | 0     | 0    | 0    | 0     | 0    | 0    | 0    | 0   | 0   | 0   | 0  | 0  | 0  | 0  | 0  | 0  | 0 | 0 |
| RSAAU_000491 | 0      | 0      | 0      | 0    | 0    | 0    | 0   | 0  | 0  | 0     | 0     | 0     | 0    | 0    | 0     | 0    | 0    | 0    | 0   | 0   | 0   | 0  | 0  | 0  | 0  | 0  | 0  | 0 | 0 |
| RSAAU_000492 | 0      | 0      | 0      | 0    | 0    | 0    | 0   | 0  | 0  | 0     | 0     | 0     | 0    | 0    | 0     | 0    | 0    | 0    | 0   | 0   | 0   | 0  | 0  | 0  | 0  | 0  | 0  | 0 | 0 |
| RSAAU_000493 | 5405   | 2412   | 1610   | 26   | 36   | 67   | 5   | 4  | 4  | 3     | 1721  | 424   | 370  | 68   | 63    | 75   | 216  | 219  | 185 | 12  | 7   | 6  | 1  | 1  | 1  | 3  | 4  | 3 | 0 |
| RSAAU_000494 | 66571  | 30546  | 30630  | 565  | 845  | 1059 | 53  | 41 | 31 | 1531  | 921   | 1207  | 256  | 255  | 203   | 392  | 386  | 328  | 144 | 86  | 113 | 24 | 24 | 19 | 37 | 36 | 31 | 0 |   |
| RSAAU_000495 | 73860  | 29766  | 23755  | 511  | 819  | 749  | 27  | 17 | 35 | 1665  | 880   | 917   | 227  | 242  | 241   | 196  | 157  | 363  | 161 | 84  | 88  | 22 | 23 | 14 | 19 | 15 | 35 | 0 |   |
| RSAAU_000496 | 0      | 0      | 0      | 0    | 0    | 0    | 0   | 0  | 0  | 0     | 0     | 0     | 0    | 0    | 0     | 0    | 0    | 0    | 0   | 0   | 0   | 0  | 0  | 0  | 0  | 0  | 0  | 0 | 0 |
| RSAAU_000497 | 0      | 0      | 0      | 0    | 0    | 0    | 0   | 0  | 0  | 0     | 0     | 0     | 0    | 0    | 0     | 0    | 0    | 0    | 0   | 0   | 0   | 0  | 0  | 0  | 0  | 0  | 0  | 0 | 0 |
| RSAAU_000498 | 0      | 0      | 0      | 0    | 0    | 0    | 0   | 0  | 0  | 0     | 0     | 0     | 0    | 0    | 0     | 0    | 0    | 0    | 0   | 0   | 0   | 0  | 0  | 0  | 0  | 0  | 0  | 0 | 0 |
| RSAAU_000499 | 406306 | 167418 | 113769 | 1599 | 1896 | 2080 | 41  | 29 | 55 | 15946 | 8617  | 7650  | 1238 | 978  | 682   | 518  | 466  | 994  | 880 | 475 | 422 | 69 | 54 | 38 | 28 | 26 | 55 | 0 |   |
| RSAAU_000500 | 288936 | 126858 | 88984  | 1580 | 2079 | 2551 | 66  | 41 | 39 | 19924 | 11472 | 10621 | 2150 | 1885 | 1470  | 1465 | 1158 | 1238 | 628 | 360 | 333 | 68 | 59 | 46 | 46 | 36 | 39 | 0 |   |
| RSAAU_000501 | 929    | 1309   | 966    | 308  | 362  | 770  | 14  | 7  | 10 | 64    | 119   | 115   | 422  | 330  | 447   | 313  | 199  | 319  | 2   | 4   | 4   | 13 | 10 | 14 | 10 | 6  | 10 | 0 |   |
| RSAAU_000502 | 412    | 4056   | 3439   | 495  | 679  | 1130 | 24  | 24 | 7  | 2357  | 365   | 356   | 1023 | 1169 | 1531  | 987  | 1652 | 416  | 40  | 52  | 27  | 25 | 22 | 21 | 21 | 7  | 7  | 0 |   |
| RSAAU_000503 | 21004  | 17152  | 18302  | 1161 | 1662 | 2703 | 17  | 12 | 38 | 1852  | 2091  | 2915  | 2130 | 2032 | 2100  | 508  | 457  | 1626 | 46  | 48  | 68  | 48 | 48 | 40 | 12 | 11 | 38 | 0 |   |
| RSAAU_000504 | 1083   | 792    | 784    | 90   | 172  | 279  | 6   | 13 | 1  | 53    | 51    | 66    | 88   | 112  | 116   | 96   | 265  | 22   | 2   | 2   | 3   | 4  | 5  | 4  | 12 | 1  | 1  | 0 |   |
| RSAAU_000505 | 2136   | 2078   | 1072   | 44   | 90   | 90   | 2   | 9  | 0  | 180   | 230   | 155   | 73   | 100  | 63    | 54   | 311  | 155  | 5   | 6   | 4   | 2  | 3  | 2  | 1  | 8  | 4  | 0 |   |
| RSAAU_000506 | 8112   | 8235   | 8840   | 1197 | 1543 | 2125 | 32  | 38 | 20 | 615   | 819   | 1149  | 1792 | 1539 | 1347  | 781  | 1181 | 698  | 18  | 23  | 33  | 51 | 44 | 38 | 22 | 34 | 20 | 0 |   |
| RSAAU_000507 | 294    | 265    | 254    | 63   | 29   | 1    | 1   | 1  | 1  | 3     | 36    | 45    | 51   | 142  | 112   | 112  | 3    | 0    | 0   | 0   | 0   | 0  | 0  | 0  | 0  | 0  | 0  | 0 | 0 |
| RSAAU_000508 | 693    | 498    | 374    | 21   | 35   | 74   | 1   | 2  | 3  | 85    | 80    | 91    | 51   | 56   | 76    | 39   | 101  | 170  | 1   | 1   | 1   | 1  | 1  | 1  | 1  | 1  | 1  | 1 | 0 |
| RSAAU_000509 | 684    | 569    | 468    | 17   | 19   | 25   | 0   | 2  | 0  | 90    | 98    | 105   | 44   | 33   | 27    | 0    | 108  | 0    | 1   | 2   | 2   | 1  | 1  | 0  | 0  | 0  | 0  | 0 | 0 |
| RSAAU_000510 | 1188   | 902    | 745    | 24   | 21   | 41   | 2   | 1  | 0  | 202   | 205   | 221   | 82   | 47   | 59    | 111  | 71   | 0    | 3   | 3   | 3   | 1  | 1  | 1  | 1  | 1  | 1  | 0 |   |
| RSAAU_000511 | 3087   | 4056   | 4837   | 251  | 554  | 128  | 21  | 14 | 2  | 75    | 68    | 79    | 468  | 572  | 613   | 646  | 531  | 675  | 221 | 9   | 13  | 13 | 21 | 19 | 20 | 11 | 21 | 7 |   |
| RSAAU_000512 | 485    | 420    | 306    | 59   | 97   | 145  | 3   | 3  | 2  | 69    | 79    | 75    | 167  | 183  | 174</ |      |      |      |     |     |     |    |    |    |    |    |    |   |   |



|             |       |       |       |      |      |      |     |     |     |       |       |       |       |       |       |       |       |       |     |     |     |     |     |     |    |     |
|-------------|-------|-------|-------|------|------|------|-----|-----|-----|-------|-------|-------|-------|-------|-------|-------|-------|-------|-----|-----|-----|-----|-----|-----|----|-----|
| RSAU_000765 | 13125 | 8742  | 8576  | 5090 | 8224 | 8361 | 157 | 100 | 130 | 370   | 323   | 414   | 2832  | 3050  | 1425  | 1155  | 1687  | 28    | 25  | 32  | 218 | 235 | 151 | 109 | 89 | 130 |
| RSAU_000766 | 18525 | 924   | 844   | 18   | 34   | 31   | 0   | 1   | 0   | 99    | 65    | 77    | 19    | 24    | 13    | 0     | 22    | 0     | 4   | 3   | 3   | 1   | 1   | 0   | 1  | 0   |
| RSAU_000767 | 193   | 182   | 198   | 137  | 189  | 242  | 16  | 22  | 15  | 351   | 711   | 404   | 215   | 198   | 181   | 411   | 720   | 809   | 0   | 6   | 12  | 7   | 4   | 1   | 11 | 19  |
| RSAU_000768 | 448   | 205   | 194   | 7    | 5    | 8    | 0   | 0   | 2   | 107   | 64    | 80    | 33    | 15    | 0     | 0     | 222   | 1     | 1   | 1   | 0   | 0   | 0   | 0   | 0  | 2   |
| RSAU_000769 | 1404  | 690   | 736   | 546  | 1180 | 3127 | 66  | 59  | 27  | 166   | 107   | 150   | 1281  | 1846  | 3169  | 2528  | 2875  | 1478  | 3   | 2   | 3   | 23  | 34  | 57  | 46 | 52  |
| RSAU_000770 | 66660 | 91290 | 36981 | 1627 | 1139 | 1461 | 108 | 84  | 70  | 27099 | 48771 | 25760 | 13055 | 6090  | 4965  | 14139 | 13992 | 13104 | 145 | 259 | 137 | 70  | 33  | 26  | 75 | 70  |
| RSAU_000771 | 594   | 576   | 519   | 86   | 76   | 145  | 0   | 1   | 0   | 453   | 217   | 189   | 259   | 488   | 4     | 0     | 35    | 369   | 2   | 335 | 2   | 3   | 2   | 3   | 6  | 4   |
| RSAU_000772 | 843   | 1165  | 1004  | 100  | 145  | 141  | 0   | 1   | 2   | 120   | 219   | 246   | 195   | 190   | 173   | 92    | 88    | 139   | 2   | 3   | 4   | 3   | 3   | 3   | 2  | 4   |
| RSAU_000773 | 722   | 217   | 100   | 52   | 39   | 27   | 4   | 0   | 4   | 289   | 113   | 68    | 411   | 205   | 90    | 515   | 0     | 737   | 2   | 1   | 0   | 2   | 1   | 0   | 3  | 0   |
| RSAU_000774 | 2604  | 1110  | 460   | 175  | 112  | 135  | 4   | 0   | 4   | 897   | 501   | 271   | 1190  | 507   | 389   | 444   | 565   | 635   | 6   | 3   | 2   | 8   | 3   | 2   | 3  | 4   |
| RSAU_000775 | 1211  | 1129  | 1449  | 213  | 502  | 672  | 24  | 21  | 12  | 170   | 207   | 348   | 590   | 927   | 788   | 1085  | 1208  | 775   | 3   | 3   | 5   | 9   | 14  | 12  | 17 | 19  |
| RSAU_000776 | 2737  | 4106  | 1786  | 450  | 900  | 1303 | 39  | 27  | 5   | 360   | 977   | 1617  | 1167  | 2261  | 3015  | 2772  | 3197  | 2816  | 3   | 8   | 10  | 18  | 26  | 23  | 27 | 24  |
| RSAU_000777 | 7634  | 8979  | 3124  | 260  | 277  | 470  | 8   | 14  | 6   | 1260  | 1943  | 883   | 847   | 601   | 648   | 425   | 946   | 166   | 17  | 25  | 12  | 11  | 8   | 9   | 6  | 12  |
| RSAU_000778 | 1756  | 1154  | 503   | 271  | 499  | 469  | 12  | 4   | 0   | 339   | 292   | 166   | 1033  | 1267  | 757   | 746   | 316   | 533   | 4   | 3   | 2   | 12  | 14  | 9   | 8  | 4   |
| RSAU_000779 | 693   | 428   | 394   | 36   | 67   | 87   | 2   | 4   | 3   | 78    | 63    | 76    | 80    | 100   | 82    | 73    | 186   | 157   | 1   | 1   | 1   | 2   | 2   | 2   | 1  | 4   |
| RSAU_000780 | 11878 | 12540 | 7013  | 1001 | 1682 | 3254 | 106 | 81  | 54  | 1797  | 2489  | 1819  | 2989  | 3347  | 4116  | 5311  | 5022  | 3762  | 26  | 35  | 26  | 43  | 48  | 59  | 76 | 72  |
| RSAU_000781 | 1375  | 2929  | 2777  | 450  | 900  | 1303 | 39  | 27  | 2   | 360   | 977   | 1617  | 1167  | 2261  | 3015  | 2772  | 3197  | 2816  | 3   | 8   | 10  | 18  | 26  | 23  | 27 | 24  |
| RSAU_000782 | 1603  | 1163  | 1002  | 272  | 326  | 603  | 11  | 11  | 2   | 366   | 349   | 302   | 1228  | 881   | 1153  | 810   | 1031  | 210   | 4   | 3   | 4   | 12  | 9   | 11  | 8  | 10  |
| RSAU_000783 | 8893  | 10591 | 6484  | 388  | 480  | 691  | 9   | 13  | 3   | 1007  | 2978  | 2382  | 1642  | 1354  | 1238  | 621   | 1142  | 296   | 20  | 30  | 24  | 16  | 14  | 12  | 6  | 12  |
| RSAU_000784 | 1172  | 748   | 917   | 42   | 68   | 115  | 1   | 5   | 4   | 198   | 91    | 146   | 77    | 83    | 89    | 29    | 190   | 171   | 2   | 2   | 2   | 2   | 2   | 1   | 4  | 4   |
| RSAU_000785 | 1145  | 897   | 707   | 147  | 229  | 345  | 14  | 1   | 4   | 241   | 240   | 255   | 612   | 635   | 608   | 951   | 85    | 388   | 2   | 3   | 3   | 6   | 7   | 6   | 10 | 4   |
| RSAU_000786 | 451   | 265   | 166   | 32   | 44   | 65   | 0   | 1   | 0   | 124   | 95    | 78    | 173   | 159   | 148   | 0     | 112   | 0     | 1   | 1   | 1   | 1   | 1   | 1   | 0  | 0   |
| RSAU_000787 | 2245  | 822   | 544   | 131  | 163  | 357  | 18  | 16  | 4   | 178   | 85    | 74    | 205   | 170   | 237   | 461   | 522   | 146   | 5   | 2   | 2   | 6   | 5   | 6   | 12 | 14  |
| RSAU_000788 | 827   | 488   | 296   | 67   | 98   | 125  | 10  | 6   | 7   | 97    | 75    | 59    | 155   | 151   | 122   | 378   | 288   | 378   | 2   | 1   | 1   | 3   | 3   | 2   | 7  | 5   |
| RSAU_000789 | 1506  | 868   | 701   | 129  | 216  | 330  | 13  | 5   | 2   | 148   | 113   | 119   | 253   | 285   | 274   | 416   | 203   | 81    | 3   | 2   | 3   | 6   | 6   | 6   | 8  | 4   |
| RSAU_000790 | 10961 | 6407  | 1482  | 640  | 1001 | 3065 | 91  | 40  | 123 | 6133  | 5900  | 4603  | 12257 | 13293 | 10740 | 12290 | 6888  | 23736 | 32  | 31  | 24  | 63  | 69  | 55  | 63 | 35  |
| RSAU_000791 | 4165  | 2444  | 2366  | 86   | 92   | 133  | 3   | 7   | 4   | 399   | 332   | 388   | 162   | 116   | 106   | 92    | 275   | 176   | 9   | 7   | 9   | 4   | 3   | 2   | 2  | 6   |
| RSAU_000792 | 13788 | 5493  | 5098  | 1155 | 1733 | 2872 | 44  | 40  | 47  | 1478  | 772   | 936   | 2444  | 2444  | 2574  | 1519  | 1757  | 2320  | 30  | 16  | 19  | 50  | 49  | 52  | 31 | 35  |
| RSAU_000793 | 12168 | 4263  | 3576  | 318  | 409  | 439  | 10  | 3   | 10  | 760   | 349   | 382   | 392   | 336   | 229   | 201   | 76    | 287   | 26  | 12  | 13  | 13  | 12  | 8   | 7  | 3   |
| RSAU_000794 | 8057  | 331   | 2277  | 2301 | 857  | 125  | 1   | 1   | 5   | 856   | 334   | 325   | 342   | 393   | 450   | 429   | 583   | 272   | 17  | 11  | 12  | 9   | 9   | 2   | 13 | 9   |
| RSAU_000795 | 4127  | 1980  | 1557  | 76   | 146  | 122  | 0   | 1   | 5   | 725   | 456   | 468   | 263   | 337   | 179   | 0     | 72    | 404   | 9   | 6   | 6   | 4   | 2   | 0   | 1  | 5   |
| RSAU_000796 | 13502 | 9692  | 7055  | 509  | 559  | 721  | 14  | 12  | 5   | 789   | 742   | 706   | 587   | 429   | 352   | 263   | 283   | 134   | 29  | 28  | 26  | 22  | 16  | 13  | 10 | 11  |
| RSAU_000797 | 319   | 273   | 139   | 30   | 13   | 32   | 0   | 2   | 0   | 82    | 92    | 61    | 153   | 44    | 69    | 0     | 212   | 0     | 1   | 1   | 0   | 1   | 0   | 2   | 1  | 0   |
| RSAU_000798 | 1856  | 1161  | 1237  | 249  | 341  | 561  | 1   | 4   | 0   | 145   | 119   | 166   | 385   | 352   | 368   | 25    | 128   | 0     | 4   | 3   | 5   | 11  | 10  | 10  | 1  | 4   |
| RSAU_000799 | 1296  | 1139  | 1629  | 232  | 411  | 517  | 13  | 11  | 11  | 139   | 142   | 114   | 290   | 329   | 413   | 330   | 344   | 214   | 4   | 6   | 10  | 12  | 9   | 6   | 10 | 6   |
| RSAU_000800 | 2204  | 1936  | 1739  | 238  | 291  | 651  | 17  | 16  | 7   | 212   | 244   | 286   | 452   | 368   | 523   | 526   | 610   | 310   | 5   | 6   | 6   | 10  | 8   | 12  | 12 | 14  |
| RSAU_000801 | 596   | 415   | 349   | 58   | 81   | 118  | 1   | 6   | 4   | 58    | 53    | 59    | 112   | 105   | 97    | 31    | 242   | 181   | 1   | 1   | 1   | 2   | 2   | 2   | 1  | 5   |
| RSAU_000802 | 1827  | 1263  | 1354  | 198  | 349  | 483  | 18  | 15  | 13  | 113   | 102   | 143   | 241   | 284   | 249   | 358   | 380   | 370   | 4   | 3   | 5   | 9   | 10  | 13  | 13 | 13  |
| RSAU_000803 | 6467  | 2912  | 2548  | 360  | 398  | 538  | 15  | 16  | 6   | 575   | 339   | 389   | 632   | 465   | 102   | 420   | 583   | 245   | 11  | 14  | 16  | 11  | 15  | 14  | 14 | 6   |
| RSAU_000804 | 476   | 281   | 225   | 17   | 26   | 14   | 3   | 1   | 0   | 101   | 78    | 82    | 71    | 72    | 24    | 205   | 87    | 0     | 1   | 1   | 1   | 1   | 0   | 1   | 0  | 2   |
| RSAU_000805 | 751   | 612   | 255   | 77   | 102  | 145  | 2   | 1   | 0   | 229   | 245   | 133   | 465   | 410   | 370   | 197   | 125   | 0     | 2   | 2   | 1   | 3   | 3   | 3   | 1  | 0   |
| RSAU_000806 | 1566  | 492   | 531   | 23   | 55   | 108  | 3   | 3   | 0   | 294   | 121   | 170   | 85    | 135   | 189   | 181   | 230   | 0     | 3   | 1   | 2   | 2   | 2   | 2   | 3  | 0   |
| RSAU_000807 | 1106  | 993   | 542   | 33   | 50   | 85   | 2   | 5   | 0   | 115   | 95    | 97    | 68    | 88    | 74    | 67    | 214   | 0     | 2   | 2   | 1   | 1   | 2   | 1   | 4  | 0   |
| RSAU_000808 | 2304  | 1686  | 1576  | 42   | 62   | 103  | 0   | 0   | 0   | 169   | 169   | 169   | 169   | 169   | 169   | 169   | 169   | 169   | 0   | 0   | 0   | 0   | 0   | 0   | 0  | 0   |
| RSAU_000809 | 9262  | 6166  | 5155  | 2770 | 4102 | 7057 | 101 | 140 | 107 | 519   | 453   | 495   | 3064  | 3023  | 3306  | 1822  | 3215  | 2761  | 20  | 17  | 19  | 119 | 117 | 128 | 70 | 124 |
| RSAU_000810 | 5903  | 2940  | 2291  | 995  | 925  | 1378 | 25  | 16  | 19  | 397   | 259   | 264   | 1320  | 818   | 774   | 541   | 440   | 588   | 13  | 8   | 8   | 43  | 26  | 25  | 17 | 14  |
| RSAU_000811 | 4707  | 3324  | 2421  | 568  | 1089 | 1283 | 20  | 24  | 20  | 1622  | 1503  | 1430  | 3865  | 4938  | 3697  | 2220  | 3390  | 3175  | 10  | 9   | 9   | 25  | 31  | 23  | 14 | 21  |
| RSAU_000812 | 3734  | 2675  | 2736  | 687  | 1025 | 1125 | 17  | 19  | 15  | 465   | 334   | 325   | 342   | 393   | 450   | 429   | 583   | 272   | 17  | 11  | 12  | 9   | 9   | 2   | 13 | 9   |
| RSAU_000813 | 988   | 714   | 670   | 236  | 341  | 73   | 8   | 10  | 24  | 332   | 314   | 386   | 1566  | 2406  | 2054  | 886   | 1377  | 3716  | 2   | 2   | 2   | 10  | 15  | 13  | 6  | 9   |
| RSAU_000814 | 1644  | 2287  | 1249  | 84   | 206  | 334  | 6   | 5   | 4   | 414   | 756   | 539   | 418   | 683   | 704   | 487   | 516   | 464   | 4   | 6   | 5   | 4   | 6   | 4   | 4  | 4   |
| RSAU_000815 | 2157  | 1658  | 1625  | 167  | 189  | 329  | 5   | 3   | 8   | 165   | 166   | 166   | 252   | 190   | 211   | 123   | 94    | 282   | 5   | 5   | 5   | 7   | 5   | 6   | 4  | 3   |
| RSAU_000816 | 1640  | 1708  | 1675  | 450  | 1055 | 2242 | 50  | 43  | 29  | 565   | 772   | 989   | 3062  | 4784  | 6461  | 5551  | 6074  | 4604  | 4   | 5   | 6   | 19  | 30  | 41  | 35 | 38  |
| RSAU_000817 | 690   | 520   | 431   | 46   | 61   | 113  | 0   | 1   | 1   | 157   | 148   | 148   | 148   | 148   | 148   | 148   | 148   | 148   | 0   | 0   | 0   | 0   | 0   | 0   | 0  | 0   |
| RSAU_000818 | 34177 | 19090 | 15895 | 284  | 471  | 643  | 17  | 12  | 13  | 2309  | 1692  | 1840  | 378   | 418   | 463   | 370   | 332   | 404   | 74  | 54  | 59  | 12  | 14  | 12  | 11 | 13  |
| RSAU_000819 | 718   | 303   | 244   | 55   | 59   | 126  | 3   | 3   | 8   | 24    | 21    | 23    | 60    | 42    | 58    | 53    | 68    | 25    | 2   | 1   | 2   | 2   | 2   | 2   | 3  | 1   |
| RSAU_000820 | 3942  | 4479  | 1957  | 164  | 221  | 406  | 16  | 8   | 1   | 349   | 244   | 364   | 208   | 200   | 180   | 210   | 319   | 203   | 228 | 9   | 13  | 7   | 6   | 7   | 11 | 7   |
| RSAU_000821 | 156   | 325   | 271   | 24   | 156  | 236  | 1   | 1   | 1   | 156   | 236   | 156   | 103   | 214   | 103   | 214   | 103   | 214   | 0   | 0   | 0   | 0   | 0   | 0   | 0  | 0   |
| RSAU_000822 | 621   | 277   | 177   | 168  | 271  | 524  | 1   | 5   | 6   | 43    | 25    | 21    | 234   | 252   | 309   | 22    | 144   | 195   | 1   | 1   | 1   | 7   | 8   | 9   | 1  | 4   |
| RSAU_000823 | 1716  | 1672  | 1567  | 36   | 31   | 30   | 1   | 2   | 2   | 392   |       |       |       |       |       |       |       |       |     |     |     |     |     |     |    |     |

|             |        |       |       |      |       |       |     |     |     |      |      |      |      |       |       |       |      |       |     |     |     |     |     |     |     |     |     |
|-------------|--------|-------|-------|------|-------|-------|-----|-----|-----|------|------|------|------|-------|-------|-------|------|-------|-----|-----|-----|-----|-----|-----|-----|-----|-----|
| RSAA_000915 | 7699   | 4003  | 3305  | 418  | 861   | 1823  | 20  | 22  | 40  | 3554 | 2423 | 2614 | 3808 | 5228  | 7035  | 2973  | 4161 | 8503  | 17  | 11  | 12  | 18  | 25  | 33  | 14  | 20  | 40  |
| RSAA_000916 | 7900   | 3958  | 2832  | 338  | 181   | 228   | 15  | 4   | 9   | 1070 | 703  | 657  | 904  | 322   | 286   | 654   | 222  | 561   | 17  | 11  | 11  | 15  | 5   | 4   | 11  | 4   | 9   |
| RSAA_000917 | 0      | 0     | 0     | 0    | 0     | 0     | 0   | 0   | 0   | 0    | 0    | 0    | 0    | 0     | 0     | 0     | 0    | 0     | 0   | 0   | 0   | 0   | 0   | 0   | 0   | 0   | 0   |
| RSAA_000918 | 0      | 0     | 0     | 0    | 0     | 0     | 0   | 0   | 0   | 0    | 0    | 0    | 0    | 0     | 0     | 0     | 0    | 0     | 0   | 0   | 0   | 0   | 0   | 0   | 0   | 0   | 0   |
| RSAA_000919 | 0      | 0     | 0     | 0    | 0     | 0     | 0   | 0   | 0   | 0    | 0    | 0    | 0    | 0     | 0     | 0     | 0    | 0     | 0   | 0   | 0   | 0   | 0   | 0   | 0   | 0   | 0   |
| RSAA_000920 | 0      | 0     | 0     | 0    | 0     | 0     | 0   | 0   | 0   | 0    | 0    | 0    | 0    | 0     | 0     | 0     | 0    | 0     | 0   | 0   | 0   | 0   | 0   | 0   | 0   | 0   | 0   |
| RSAA_000921 | 15     | 4     | 4     | 4    | 2     | 2     | 1   | 1   | 1   | 2    | 1    | 1    | 1    | 1     | 1     | 1     | 1    | 1     | 1   | 1   | 1   | 1   | 1   | 1   | 1   | 1   | 1   |
| RSAA_000922 | 101    | 105   | 83    | 136  | 226   | 683   | 12  | 5   | 0   | 28   | 39   | 40   | 761  | 843   | 1619  | 1096  | 581  | 80    | 0   | 0   | 0   | 0   | 0   | 0   | 0   | 0   | 0   |
| RSAA_000923 | 70     | 45    | 44    | 42   | 68    | 99    | 0   | 0   | 0   | 4    | 2    | 2    | 3    | 34    | 37    | 34    | 0    | 0     | 0   | 0   | 0   | 0   | 0   | 0   | 0   | 0   | 0   |
| RSAA_000924 | 18     | 14    | 15    | 10   | 31    | 8     | 5   | 0   | 0   | 4    | 4    | 6    | 50   | 26    | 10    | 0     | 0    | 0     | 0   | 0   | 0   | 0   | 0   | 0   | 0   | 0   | 0   |
| RSAA_000925 | 47     | 44    | 22    | 12   | 27    | 0     | 0   | 0   | 0   | 5    | 7    | 4    | 30   | 20    | 28    | 0     | 0    | 0     | 0   | 0   | 0   | 0   | 0   | 0   | 0   | 0   | 0   |
| RSAA_000926 | 1211   | 1201  | 570   | 43   | 87    | 5     | 3   | 2   | 2   | 276  | 360  | 223  | 194  | 243   | 166   | 368   | 281  | 210   | 3   | 3   | 2   | 2   | 2   | 2   | 2   | 2   | 2   |
| RSAA_000927 | 618    | 526   | 454   | 22   | 21    | 50    | 3   | 1   | 0   | 52   | 58   | 66   | 26   | 23    | 35    | 82    | 34   | 0     | 1   | 2   | 2   | 1   | 1   | 1   | 1   | 1   | 1   |
| RSAA_000928 | 557    | 266   | 190   | 10   | 34    | 37    | 4   | 0   | 0   | 210  | 131  | 123  | 74   | 169   | 117   | 487   | 0    | 0     | 1   | 1   | 1   | 0   | 1   | 1   | 1   | 1   | 1   |
| RSAA_000929 | 594    | 579   | 551   | 111  | 231   | 470   | 7   | 12  | 5   | 87   | 112  | 139  | 324  | 449   | 581   | 333   | 727  | 340   | 1   | 2   | 2   | 5   | 7   | 9   | 5   | 11  | 5   |
| RSAA_000930 | 2065   | 1466  | 1088  | 53   | 71    | 80    | 4   | 1   | 0   | 479  | 167  | 162  | 311  | 81    | 31    | 172   | 35   | 0     | 4   | 4   | 4   | 2   | 2   | 1   | 3   | 0   | 0   |
| RSAA_000931 | 2011   | 1533  | 1268  | 193  | 242   | 229   | 13  | 17  | 2   | 122  | 20   | 154  | 142  | 190   | 112   | 251   | 417  | 55    | 4   | 4   | 4   | 4   | 4   | 4   | 4   | 4   | 4   |
| RSAA_000932 | 2508   | 1537  | 1998  | 144  | 232   | 288   | 11  | 6   | 13  | 120  | 98   | 167  | 138  | 148   | 117   | 120   | 292  | 5     | 4   | 4   | 8   | 6   | 7   | 5   | 8   | 5   | 13  |
| RSAA_000933 | 1703   | 1187  | 1190  | 72   | 144   | 131   | 12  | 4   | 2   | 173  | 158  | 207  | 144  | 192   | 111   | 392   | 166  | 93    | 4   | 3   | 4   | 3   | 4   | 2   | 8   | 4   | 2   |
| RSAA_000934 | 6009   | 5096  | 4190  | 205  | 355   | 374   | 4   | 3   | 12  | 597  | 664  | 699  | 402  | 464   | 310   | 128   | 122  | 549   | 13  | 14  | 15  | 9   | 10  | 7   | 3   | 12  |     |
| RSAA_000935 | 1086   | 470   | 638   | 5345 | 9494  | 17953 | 378 | 198 | 226 | 75   | 42   | 75   | 7293 | 8523  | 10375 | 8415  | 5608 | 7513  | 2   | 1   | 2   | 230 | 271 | 325 | 264 | 176 | 236 |
| RSAA_000936 | 1293   | 523   | 770   | 5652 | 10794 | 23291 | 454 | 201 | 481 | 100  | 53   | 102  | 8706 | 11080 | 15195 | 11411 | 6427 | 17287 | 3   | 1   | 3   | 241 | 307 | 423 | 316 | 178 | 481 |
| RSAA_000937 | 1377   | 901   | 748   | 184  | 317   | 463   | 13  | 14  | 15  | 97   | 83   | 90   | 256  | 294   | 273   | 296   | 405  | 488   | 3   | 3   | 3   | 3   | 8   | 9   | 8   | 13  | 15  |
| RSAA_000938 | 636    | 656   | 764   | 71   | 105   | 197   | 1   | 1   | 1   | 51   | 69   | 105  | 113  | 111   | 133   | 26    | 79   | 0     | 1   | 2   | 3   | 3   | 3   | 3   | 4   | 1   | 0   |
| RSAA_000939 | 225    | 260   | 178   | 18   | 13    | 36    | 0   | 0   | 0   | 43   | 66   | 59   | 88   | 33    | 58    | 0     | 0    | 0     | 0   | 0   | 0   | 0   | 0   | 0   | 0   | 0   | 0   |
| RSAA_000940 | 9239   | 4229  | 3979  | 3207 | 5178  | 5467  | 39  | 8   | 3   | 200  | 120  | 147  | 1373 | 1477  | 991   | 272   | 462  | 329   | 20  | 12  | 15  | 139 | 147 | 100 | 27  | 46  | 33  |
| RSAA_000941 | 321    | 360   | 264   | 52   | 80    | 143   | 5   | 1   | 2   | 60   | 88   | 84   | 192  | 197   | 224   | 302   | 76   | 173   | 1   | 1   | 1   | 2   | 2   | 3   | 3   | 1   | 2   |
| RSAA_000942 | 828    | 439   | 416   | 133  | 154   | 279   | 10  | 2   | 2   | 143  | 99   | 123  | 455  | 351   | 404   | 558   | 142  | 159   | 2   | 1   | 2   | 6   | 4   | 5   | 7   | 2   | 2   |
| RSAA_000943 | 9009   | 6010  | 5339  | 1255 | 1726  | 2879  | 59  | 58  | 41  | 596  | 524  | 609  | 1649 | 1511  | 1602  | 1265  | 1582 | 1257  | 19  | 17  | 20  | 54  | 49  | 52  | 41  | 52  | 41  |
| RSAA_000944 | 4416   | 451   | 2850  | 812  | 1288  | 2010  | 89  | 47  | 42  | 416  | 416  | 416  | 1254 | 1254  | 4118  | 4265  | 4317 | 7395  | 188 | 114 | 167 | 55  | 50  | 55  | 57  | 61  | 77  |
| RSAA_000945 | 1447   | 651   | 581   | 60   | 106   | 117   | 11  | 4   | 0   | 406  | 239  | 279  | 322  | 391   | 274   | 994   | 204  | 3     | 3   | 2   | 2   | 3   | 3   | 2   | 8   | 4   | 0   |
| RSAA_000946 | 21815  | 9800  | 9118  | 406  | 550   | 778   | 38  | 13  | 30  | 2941 | 1733 | 2106 | 1080 | 975   | 876   | 1650  | 718  | 1862  | 47  | 28  | 34  | 18  | 16  | 14  | 26  | 11  | 30  |
| RSAA_000947 | 52671  | 19441 | 20842 | 642  | 844   | 1195  | 43  | 22  | 54  | 2163 | 1047 | 1467 | 520  | 456   | 410   | 568   | 370  | 1021  | 114 | 55  | 77  | 28  | 24  | 22  | 30  | 20  | 54  |
| RSAA_000948 | 86338  | 40121 | 45208 | 1294 | 1746  | 3031  | 81  | 69  | 77  | 6407 | 3905 | 5749 | 1995 | 1704  | 1800  | 1936  | 2098 | 2631  | 188 | 114 | 167 | 55  | 50  | 55  | 57  | 61  | 77  |
| RSAA_000949 | 4416   | 451   | 2850  | 812  | 1288  | 2010  | 89  | 47  | 42  | 416  | 416  | 416  | 1254 | 1254  | 4118  | 4265  | 4317 | 7395  | 188 | 114 | 167 | 55  | 50  | 55  | 57  | 61  | 77  |
| RSAA_000950 | 11244  | 18267 | 13042 | 915  | 1106  | 2042  | 33  | 27  | 22  | 6007 | 2273 | 2120 | 1714 | 1784  | 1820  | 1620  | 1009 | 961   | 24  | 52  | 49  | 39  | 31  | 37  | 23  | 24  | 22  |
| RSAA_000951 | 297    | 381   | 394   | 531  | 793   | 1521  | 8   | 7   | 17  | 50   | 84   | 114  | 1773 | 1764  | 2151  | 435   | 485  | 1324  | 1   | 1   | 1   | 23  | 23  | 27  | 6   | 17  | 1   |
| RSAA_000952 | 517    | 322   | 411   | 476  | 552   | 1027  | 6   | 3   | 3   | 37   | 30   | 51   | 882  | 527   | 625   | 140   | 89   | 100   | 1   | 1   | 2   | 20  | 16  | 19  | 4   | 3   | 3   |
| RSAA_000953 | 189    | 137   | 207   | 19   | 231   | 335   | 2   | 1   | 1   | 21   | 20   | 41   | 272  | 352   | 324   | 0     | 0    | 94    | 5   | 0   | 1   | 5   | 7   | 6   | 0   | 2   | 1   |
| RSAA_000954 | 127    | 52    | 134   | 44   | 61    | 82    | 0   | 0   | 0   | 39   | 21   | 71   | 268  | 248   | 212   | 0     | 0    | 0     | 0   | 0   | 0   | 0   | 0   | 0   | 0   | 0   | 0   |
| RSAA_000955 | 229    | 194   | 376   | 78   | 135   | 132   | 0   | 0   | 1   | 27   | 30   | 78   | 187  | 215   | 134   | 0     | 0    | 55    | 1   | 1   | 1   | 3   | 4   | 2   | 0   | 0   | 0   |
| RSAA_000956 | 778    | 699   | 1352  | 158  | 302   | 276   | 2   | 2   | 1   | 29   | 34   | 86   | 116  | 148   | 86    | 24    | 30   | 17    | 2   | 2   | 5   | 7   | 9   | 5   | 1   | 2   | 1   |
| RSAA_000957 | 415    | 411   | 737   | 38   | 77    | 68    | 2   | 4   | 0   | 22   | 29   | 69   | 41   | 56    | 31    | 35    | 90   | 0     | 1   | 1   | 3   | 2   | 2   | 1   | 1   | 4   | 0   |
| RSAA_000958 | 293    | 368   | 387   | 20   | 20    | 28    | 0   | 0   | 0   | 23   | 23   | 38   | 61   | 69    | 38    | 51    | 65   | 65    | 2   | 1   | 1   | 2   | 1   | 1   | 0   | 0   | 0   |
| RSAA_000959 | 306    | 362   | 599   | 21   | 60    | 70    | 0   | 0   | 0   | 44   | 68   | 147  | 59   | 113   | 84    | 0     | 0    | 0     | 1   | 1   | 2   | 1   | 2   | 1   | 0   | 0   | 0   |
| RSAA_000960 | 905    | 1042  | 1562  | 75   | 119   | 98    | 0   | 2   | 2   | 50   | 75   | 147  | 81   | 86    | 45    | 0     | 45   | 50    | 2   | 3   | 6   | 3   | 2   | 0   | 2   | 2   | 5   |
| RSAA_000961 | 900    | 1135  | 1026  | 80   | 125   | 159   | 2   | 2   | 5   | 58   | 97   | 115  | 103  | 107   | 87    | 42    | 53   | 150   | 2   | 3   | 3   | 4   | 4   | 3   | 1   | 2   | 5   |
| RSAA_000962 | 187    | 420   | 283   | 8    | 40    | 28    | 0   | 0   | 0   | 47   | 29   | 46   | 15   | 13    | 23    | 65    | 0    | 0     | 1   | 1   | 1   | 1   | 1   | 1   | 0   | 0   | 0   |
| RSAA_000963 | 1837   | 1122  | 888   | 46   | 54    | 145   | 1   | 4   | 1   | 107  | 85   | 88   | 52   | 41    | 70    | 18    | 95   | 26    | 4   | 3   | 3   | 2   | 2   | 3   | 1   | 4   | 1   |
| RSAA_000964 | 828    | 611   | 485   | 42   | 46    | 55    | 1   | 2   | 0   | 117  | 113  | 117  | 117  | 85    | 65    | 45    | 116  | 0     | 2   | 2   | 3   | 2   | 1   | 1   | 1   | 2   | 0   |
| RSAA_000965 | 1      | 1     | 0     | 1    | 0     | 0     | 0   | 0   | 0   | 0    | 0    | 0    | 11   | 0     | 0     | 0     | 0    | 0     | 0   | 0   | 0   | 0   | 0   | 0   | 0   | 0   | 0   |
| RSAA_000966 | 20429  | 13364 | 8694  | 572  | 529   | 841   | 26  | 29  | 27  | 1268 | 1105 | 939  | 637  | 438   | 443   | 527   | 930  | 783   | 45  | 38  | 33  | 22  | 15  | 15  | 18  | 32  | 27  |
| RSAA_000967 | 2917   | 1236  | 979   | 71   | 101   | 184   | 19  | 7   | 0   | 203  | 112  | 115  | 91   | 107   | 107   | 426   | 199  | 19    | 6   | 4   | 4   | 0   | 3   | 3   | 6   | 0   | 0   |
| RSAA_000968 | 8634   | 7482  | 4196  | 3740 | 1170  | 1797  | 32  | 36  | 21  | 1299 | 1476 | 2081 | 2893 | 2135  | 2260  | 1550  | 1788 | 1455  | 19  | 21  | 16  | 42  | 33  | 33  | 22  | 26  | 21  |
| RSAA_000969 | 14096  | 6987  | 6158  | 512  | 621   | 1012  | 28  | 13  | 15  | 4313 | 2804 | 3229 | 3092 | 2499  | 2589  | 2759  | 1630 | 2114  | 31  | 20  | 23  | 22  | 18  | 20  | 12  | 15  | 10  |
| RSAA_000970 | 47331  | 24760 | 21633 | 1405 | 1767  | 2214  | 48  | 30  | 45  | 2249 | 1543 | 1723 | 1318 | 1123  | 979   | 734   | 584  | 985   | 103 | 71  | 78  | 61  | 51  | 40  | 34  | 27  | 45  |
| RSAA_000971 | 130265 | 44573 | 33619 | 1044 | 1453  | 549   | 21  | 34  | 28  | 216  | 453  | 526  | 311  | 365   | 316   | 163   | 45   | 11    | 7   | 9   | 16  | 35  | 25  | 10  | 16  | 28  | 28  |
| RSAA_000972 | 1820   | 2068  | 4997  | 121  | 151   | 215   | 8   | 10  | 6   | 145  | 217  | 885  | 191  | 159   | 143   | 206   | 328  | 221   | 4   | 6   | 19  | 5   | 4   | 4   | 6   | 9   | 8   |
| RSAA_000973 | 3403   | 3723  | 3290  | 359  | 533   | 551   | 22  | 26  | 24  |      |      |      |      |       |       |       |      |       |     |     |     |     |     |     |     |     |     |













|              |        |       |       |      |      |      |     |     |     |       |       |       |      |      |      |       |      |       |      |     |    |     |    |    |     |     |     |     |     |   |
|--------------|--------|-------|-------|------|------|------|-----|-----|-----|-------|-------|-------|------|------|------|-------|------|-------|------|-----|----|-----|----|----|-----|-----|-----|-----|-----|---|
| RSAAU_001819 | 4604   | 2588  | 1211  | 144  | 42   | 40   | 1   | 0   | 0   | 0     | 2162  | 1593  | 974  | 1744 | 1334 | 259   | 157  | 151   | 0    | 0   | 10 | 7   | 5  | 6  | 1   | 1   | 1   | 0   | 0   |   |
| RSAAU_001820 | 479    | 358   | 315   | 81   | 101  | 177  | 5   | 3   | 2   | 3     | 37    | 36    | 42   | 125  | 104  | 116   | 126  | 96    | 72   | 2   | 1  | 1   | 1  | 3  | 3   | 3   | 4   | 3   | 2   |   |
| RSAAU_001821 | 2707   | 3753  | 271   | 533  | 989  | 22   | 2   | 12  | 20  | 3     | 359   | 34    | 457  | 518  | 873  | 801   | 336  | 435   | 823  | 8   | 0  | 10  | 12 | 6  | 6   | 13  | 15  | 11  | 20  |   |
| RSAAU_001822 | 3019   | 1561  | 1704  | 142  | 151  | 200  | 5   | 6   | 7   | 4     | 442   | 299   | 427  | 410  | 290  | 244   | 235  | 360   | 472  | 6   | 4  | 6   | 6  | 4  | 4   | 5   | 7   | 7   |     |   |
| RSAAU_001823 | 2054   | 2257  | 1590  | 128  | 234  | 497  | 7   | 7   | 6   | 3     | 319   | 460   | 424  | 393  | 479  | 646   | 350  | 446   | 430  | 5   | 6  | 6   | 5  | 7  | 9   | 5   | 6   | 6   |     |   |
| RSAAU_001824 | 1897   | 940   | 1066  | 319  | 446  | 572  | 17  | 14  | 8   | 2     | 174   | 178   | 264  | 912  | 649  | 692   | 793  | 831   | 533  | 4   | 3  | 4   | 14 | 13 | 10  | 12  | 12  | 8   |     |   |
| RSAAU_001825 | 1518   | 255   | 254   | 25   | 39   | 43   | 0   | 0   | 0   | 0     | 52    | 36    | 46   | 45   | 57   | 52    | 45   | 101   | 47   | 5   | 5  | 5   | 3  | 4  | 3   | 1   | 0   | 0   |     |   |
| RSAAU_001826 | 1602   | 991   | 998   | 88   | 91   | 5    | 2   | 0   | 2   | 0     | 246   | 121   | 160  | 107  | 121  | 55    | 150  | 17    | 0    | 0   | 0  | 4   | 4  | 4  | 3   | 1   | 0   | 2   | 0   |   |
| RSAAU_001827 | 874    | 397   | 451   | 31   | 21   | 42   | 2   | 3   | 2   | 104   | 62    | 92    | 73   | 33   | 42   | 77    | 147  | 110   | 2    | 1   | 2  | 1   | 1  | 1  | 1   | 1   | 1   | 3   | 2   |   |
| RSAAU_001828 | 1608   | 1025  | 960   | 34   | 52   | 88   | 0   | 3   | 0   | 146   | 122   | 149   | 61   | 62   | 67   | 0     | 111  | 0     | 0    | 3   | 3  | 4   | 1  | 1  | 2   | 0   | 3   | 0   | 1   |   |
| RSAAU_001829 | 1062   | 892   | 875   | 35   | 50   | 119  | 10  | 4   | 1   | 227   | 250   | 321   | 148  | 141  | 213  | 690   | 351  | 98    | 2    | 2   | 3  | 2   | 1  | 3  | 2   | 1   | 7   | 4   | 1   |   |
| RSAAU_001830 | 199    | 158   | 75    | 2    | 1    | 1    | 0   | 0   | 0   | 91    | 95    | 59    | 18   | 30   | 7    | 148   | 189  | 0     | 0    | 0   | 0  | 0   | 0  | 0  | 0   | 0   | 0   | 1   | 0   |   |
| RSAAU_001831 | 3139   | 2808  | 2079  | 111  | 189  | 354  | 4   | 8   | 6   | 199   | 233   | 226   | 139  | 157  | 188  | 81    | 208  | 175   | 7    | 8   | 8  | 5   | 6  | 3  | 7   | 6   | 3   | 7   | 6   |   |
| RSAAU_001832 | 42     | 24    | 29    | 201  | 292  | 225  | 8   | 10  | 6   | 11    | 8     | 13    | 1114 | 1078 | 528  | 723   | 1150 | 775   | 0    | 0   | 0  | 0   | 0  | 0  | 0   | 8   | 4   | 6   | 9   |   |
| RSAAU_001833 | 318    | 333   | 410   | 1740 | 2654 | 4106 | 227 | 162 | 105 | 14    | 20    | 32    | 1588 | 1614 | 1587 | 3380  | 3069 | 2236  | 1    | 1   | 2  | 75  | 76 | 74 | 158 | 144 | 105 | 105 | 105 |   |
| RSAAU_001834 | 1388   | 3074  | 3259  | 399  | 702  | 649  | 40  | 25  | 88  | 111   | 323   | 448   | 632  | 741  | 435  | 1035  | 823  | 3256  | 3    | 9   | 12 | 17  | 20 | 11 | 28  | 22  | 88  | 88  | 88  |   |
| RSAAU_001835 | 3265   | 5322  | 6387  | 409  | 790  | 876  | 84  | 38  | 131 | 152   | 545   | 804   | 624  | 904  | 587  | 2093  | 1204 | 4668  | 4    | 15  | 23 | 17  | 23 | 16 | 58  | 34  | 22  | 131 | 131 |   |
| RSAAU_001836 | 516    | 350   | 389   | 49   | 133  | 199  | 1   | 1   | 5   | 34    | 30    | 44    | 64   | 116  | 111  | 21    | 27   | 153   | 1    | 1   | 1  | 2   | 4  | 4  | 1   | 1   | 1   | 5   | 6   |   |
| RSAAU_001837 | 316    | 266   | 283   | 95   | 124  | 220  | 11  | 5   | 6   | 19    | 21    | 30    | 117  | 101  | 114  | 221   | 127  | 172   | 1    | 1   | 1  | 1   | 4  | 4  | 8   | 4   | 6   | 6   | 6   |   |
| RSAAU_001838 | 117    | 75    | 64    | 7    | 22   | 41   | 0   | 0   | 0   | 20    | 16    | 18    | 23   | 49   | 58   | 0     | 0    | 0     | 0    | 0   | 0  | 0   | 0  | 1  | 1   | 0   | 0   | 0   | 0   |   |
| RSAAU_001839 | 6122   | 2201  | 3039  | 68   | 84   | 135  | 7   | 4   | 9   | 721   | 448   | 614   | 158  | 130  | 133  | 285   | 193  | 488   | 13   | 8   | 11 | 3   | 2  | 2  | 5   | 4   | 9   | 9   | 9   |   |
| RSAAU_001840 | 3920   | 2434  | 2279  | 24   | 41   | 52   | 1   | 0   | 2   | 520   | 430   | 526   | 63   | 72   | 58   | 43    | 0    | 124   | 9    | 7   | 8  | 1   | 1  | 1  | 1   | 1   | 0   | 2   | 2   |   |
| RSAAU_001841 | 15791  | 11942 | 10238 | 54   | 85   | 165  | 2   | 9   | 4   | 1720  | 1706  | 1911  | 116  | 121  | 150  | 70    | 401  | 200   | 34   | 34  | 38 | 2   | 3  | 3  | 1   | 8   | 4   | 10  | 10  |   |
| RSAAU_001842 | 492    | 656   | 398   | 15   | 76   | 64   | 0   | 5   | 3   | 70    | 123   | 97    | 42   | 143  | 76   | 0     | 293  | 198   | 1    | 2   | 1  | 1   | 2  | 1  | 1   | 0   | 4   | 3   | 3   |   |
| RSAAU_001843 | 258    | 209   | 182   | 18   | 48   | 24   | 0   | 0   | 0   | 61    | 65    | 74    | 84   | 150  | 47   | 0     | 0    | 0     | 0    | 1   | 1  | 1   | 1  | 1  | 0   | 0   | 0   | 0   | 0   |   |
| RSAAU_001844 | 173    | 146   | 145   | 7    | 1    | 0    | 0   | 0   | 0   | 26    | 29    | 46    | 21   | 0    | 0    | 0     | 63   | 0     | 0    | 0   | 0  | 0   | 0  | 0  | 0   | 1   | 0   | 0   | 0   |   |
| RSAAU_001845 | 102    | 78    | 46    | 9    | 13   | 7    | 1   | 0   | 0   | 8     | 47    | 47    | 36   | 82   | 78   | 27    | 148  | 0     | 1700 | 0   | 0  | 0   | 0  | 0  | 0   | 0   | 1   | 0   | 8   |   |
| RSAAU_001846 | 923    | 970   | 992   | 74   | 112  | 147  | 7   | 10  | 6   | 130   | 179   | 239   | 206  | 207  | 173  | 318   | 578  | 389   | 2    | 3   | 4  | 3   | 3  | 3  | 5   | 9   | 6   | 6   | 6   |   |
| RSAAU_001847 | 285    | 271   | 200   | 13   | 23   | 72   | 5   | 6   | 13  | 67    | 84    | 81    | 60   | 71   | 142  | 381   | 582  | 1417  | 1    | 1   | 1  | 1   | 1  | 1  | 1   | 4   | 5   | 13  | 13  |   |
| RSAAU_001848 | 320    | 371   | 370   | 10   | 24   | 26   | 0   | 0   | 0   | 41    | 41    | 61    | 61   | 61   | 61   | 61    | 61   | 61    | 0    | 0   | 0  | 0   | 0  | 0  | 0   | 0   | 0   | 0   | 0   |   |
| RSAAU_001849 | 257    | 184   | 140   | 13   | 9    | 24   | 0   | 0   | 0   | 55    | 51    | 51    | 55   | 25   | 43   | 0     | 0    | 0     | 0    | 1   | 1  | 1   | 1  | 1  | 0   | 0   | 0   | 0   | 0   |   |
| RSAAU_001850 | 394    | 344   | 177   | 26   | 23   | 36   | 5   | 0   | 0   | 18    | 21    | 14    | 24   | 14   | 14   | 77    | 0    | 0     | 0    | 1   | 1  | 1   | 1  | 1  | 1   | 1   | 4   | 0   | 0   |   |
| RSAAU_001851 | 260    | 148   | 136   | 18   | 10   | 24   | 2   | 1   | 4   | 24    | 18    | 21    | 33   | 12   | 18   | 60    | 38   | 173   | 1    | 0   | 1  | 1   | 1  | 0  | 0   | 1   | 1   | 4   | 0   |   |
| RSAAU_001852 | 32     | 15    | 15    | 8    | 6    | 8    | 3   | 0   | 3   | 8     | 5     | 6     | 40   | 20   | 17   | 245   | 0    | 351   | 0    | 0   | 0  | 0   | 0  | 0  | 0   | 0   | 2   | 0   | 3   |   |
| RSAAU_001853 | 117    | 13    | 11    | 0    | 0    | 0    | 0   | 0   | 0   | 17    | 13    | 11    | 0    | 4    | 4    | 0     | 0    | 0     | 0    | 0   | 0  | 0   | 0  | 0  | 0   | 0   | 0   | 0   | 0   | 0 |
| RSAAU_001854 | 12     | 9     | 13    | 0    | 2    | 1    | 1   | 0   | 0   | 4     | 8     | 0     | 9    | 3    | 120  | 0     | 0    | 0     | 0    | 0   | 0  | 0   | 0  | 0  | 0   | 0   | 0   | 0   | 0   | 0 |
| RSAAU_001855 | 2950   | 1557  | 1254  | 136  | 204  | 375  | 8   | 4   | 0   | 357   | 247   | 260   | 324  | 324  | 379  | 311   | 198  | 0     | 6    | 4   | 5  | 6   | 6  | 6  | 7   | 6   | 4   | 0   | 0   |   |
| RSAAU_001856 | 1737   | 665   | 697   | 79   | 146  | 280  | 1   | 7   | 1   | 121   | 60    | 83    | 108  | 133  | 183  | 22    | 228  | 32    | 4    | 2   | 3  | 3   | 3  | 4  | 5   | 1   | 7   | 1   | 1   |   |
| RSAAU_001857 | 8774   | 9495  | 9115  | 383  | 619  | 928  | 20  | 24  | 14  | 443   | 629   | 789   | 382  | 411  | 117  | 834   | 956  | 1372  | 19   | 27  | 34 | 16  | 16 | 16 | 14  | 21  | 14  | 14  | 14  |   |
| RSAAU_001858 | 2460   | 3791  | 2907  | 109  | 148  | 223  | 13  | 7   | 2   | 713   | 1425  | 1428  | 616  | 558  | 534  | 1200  | 822  | 264   | 5    | 11  | 11 | 5   | 4  | 4  | 9   | 6   | 2   | 2   | 2   |   |
| RSAAU_001859 | 202    | 134   | 76    | 20   | 28   | 69   | 0   | 2   | 1   | 22    | 19    | 14    | 43   | 40   | 63   | 0     | 90   | 50    | 0    | 0   | 0  | 0   | 1  | 1  | 1   | 0   | 2   | 1   | 0   |   |
| RSAAU_001860 | 890    | 665   | 522   | 241  | 423  | 520  | 4   | 11  | 0   | 16    | 58    | 60    | 321  | 376  | 293  | 87    | 304  | 311   | 2    | 2   | 2  | 10  | 12 | 9  | 3   | 10  | 1   | 1   | 1   |   |
| RSAAU_001861 | 774    | 590   | 400   | 111  | 315  | 425  | 9   | 10  | 18  | 106   | 100   | 89    | 285  | 538  | 463  | 377   | 534  | 1080  | 2    | 2   | 2  | 5   | 9  | 8  | 6   | 9   | 6   | 9   | 18  |   |
| RSAAU_001862 | 1428   | 951   | 828   | 179  | 165  | 180  | 10  | 3   | 10  | 351   | 148   | 199   | 361  | 229  | 331  | 229   | 331  | 143   | 3    | 3   | 3  | 3   | 3  | 3  | 3   | 3   | 3   | 3   | 3   |   |
| RSAAU_001863 | 19099  | 19174 | 9369  | 334  | 427  | 1080 | 48  | 22  | 67  | 19227 | 25367 | 16195 | 6650 | 5665 | 9017 | 15594 | 9094 | 31125 | 41   | 54  | 35 | 15  | 12 | 20 | 34  | 19  | 67  | 67  | 67  |   |
| RSAAU_001864 | 53679  | 32855 | 20781 | 320  | 294  | 680  | 13  | 10  | 20  | 7767  | 6242  | 5188  | 915  | 560  | 823  | 606   | 593  | 1334  | 116  | 93  | 77 | 14  | 8  | 12 | 9   | 9   | 20  | 20  | 20  |   |
| RSAAU_001865 | 4125   | 2455  | 1753  | 35   | 31   | 85   | 0   | 0   | 0   | 2390  | 1865  | 1740  | 400  | 236  | 411  | 0     | 237  | 0     | 9    | 7   | 6  | 2   | 1  | 2  | 0   | 1   | 0   | 0   | 0   |   |
| RSAAU_001866 | 101365 | 61872 | 4724  | 896  | 1123 | 504  | 47  | 54  | 33  | 6405  | 5094  | 561   | 1117 | 833  | 1341 | 956   | 1372 | 969   | 19   | 174 | 93 | 163 | 38 | 32 | 46  | 33  | 47  | 33  | 33  |   |
| RSAAU_001867 | 22400  | 10563 | 12088 | 251  | 447  | 785  | 24  | 8   | 17  | 2553  | 1578  | 2360  | 564  | 670  | 747  | 880   | 373  | 892   | 48   | 30  | 44 | 11  | 13 | 14 | 17  | 17  | 17  | 17  | 17  |   |
| RSAAU_001868 | 1285   | 1110  | 909   | 57   | 72   | 121  | 1   | 1   | 3   | 109   | 123   | 132   | 95   | 80   | 86   | 27    | 34   | 117   | 3    | 3   | 3  | 3   | 3  | 3  | 3   | 3   | 3   | 3   | 3   |   |
| RSAAU_001869 | 2275   | 1987  | 1874  | 117  | 152  | 227  | 9   | 13  | 5   | 125   | 143   | 176   | 127  | 110  | 104  | 159   | 293  | 126   | 5    | 6   | 7  | 5   | 4  | 4  | 6   | 11  | 5   | 1   | 3   |   |
| RSAAU_001870 | 679    | 445   | 322   | 91   | 121  | 237  | 5   | 19  | 2   | 58    | 50    | 47    | 154  | 138  | 170  | 138   | 668  | 79    | 1    | 1   | 1  | 4   | 3  | 4  | 4   | 4   | 17  | 2   | 2   |   |
| RSAAU_001871 | 422    | 289   | 246   | 5    | 3    | 4    | 0   | 0   | 0   | 11    | 11    | 11    | 11   | 11   | 11   | 11    | 11   | 11    | 0    | 0   | 0  | 0   | 0  | 0  | 0   | 0   | 0   | 0   | 0   | 0 |
| RSAAU_001872 | 740    | 434   | 373   | 4    | 3    | 6    | 0   | 0   | 0   | 63    | 48    | 54    | 6    | 3    | 4    | 0     | 0    | 0     | 0    | 0   | 0  | 0   | 0  | 0  | 0   | 0   | 0   | 0   | 0   | 0 |
| RSAAU_001873 | 8381   | 9520  | 6115  | 417  | 679  | 1238 | 26  | 14  | 16  | 1076  | 1604  | 1346  | 1057 | 1147 | 1329 | 1075  | 737  | 946   | 18   | 27  | 23 | 18  | 19 | 22 | 18  | 12  | 16  | 16  | 16  |   |
| RSAAU_001874 | 1208   | 1468  | 1308  | 39   | 119  | 149  | 6   | 1   | 1   | 8     |       |       |      |      |      |       |      |       |      |     |    |     |    |    |     |     |     |     |     |   |



|             |       |       |       |      |      |       |     |     |     |      |      |      |      |       |       |       |       |       |      |     |     |     |     |     |     |     |     |     |     |   |
|-------------|-------|-------|-------|------|------|-------|-----|-----|-----|------|------|------|------|-------|-------|-------|-------|-------|------|-----|-----|-----|-----|-----|-----|-----|-----|-----|-----|---|
| RSAU_002121 | 136   | 158   | 172   | 56   | 55   | 85    | 4   | 6   | 8   | 36   | 55   | 79   | 298  | 195   | 191   | 347   | 663   | 993   | 0    | 0   | 1   | 2   | 2   | 2   | 1   | 3   | 5   | 8   |     |   |
| RSAU_002122 | 307   | 169   | 211   | 57   | 67   | 144   | 4   | 4   | 5   | 61   | 44   | 71   | 223  | 175   | 239   | 256   | 325   | 457   | 1    | 0   | 1   | 2   | 2   | 2   | 3   | 3   | 4   | 5   |     |   |
| RSAU_002123 | 785   | 517   | 692   | 133  | 156  | 304   | 1   | 4   | 3   | 37   | 32   | 48   | 125  | 97    | 121   | 76    | 0     | 87    | 2    | 4   | 2   | 6   | 3   | 6   | 3   | 4   | 4   | 4   |     |   |
| RSAU_002124 | 219   | 82    | 88    | 20   | 48   | 36    | 0   | 2   | 0   | 39   | 19   | 27   | 71   | 113   | 54    | 0     | 147   | 0     | 0    | 0   | 0   | 1   | 1   | 1   | 1   | 0   | 2   | 0   |     |   |
| RSAU_002125 | 323   | 182   | 192   | 50   | 54   | 43    | 0   | 1   | 0   | 38   | 28   | 38   | 116  | 84    | 42    | 0     | 48    | 0     | 1    | 1   | 1   | 2   | 2   | 1   | 0   | 1   | 0   | 0   |     |   |
| RSAU_002126 | 481   | 291   | 377   | 89   | 108  | 131   | 3   | 1   | 3   | 63   | 50   | 85   | 233  | 188   | 145   | 128   | 54    | 183   | 1    | 1   | 1   | 4   | 3   | 2   | 2   | 1   | 1   | 3   |     |   |
| RSAU_002127 | 387   | 236   | 279   | 57   | 38   | 236   | 2   | 1   | 0   | 137  | 30   | 40   | 109  | 308   | 47    | 11    | 71    | 31    | 0    | 0   | 0   | 1   | 1   | 1   | 1   | 1   | 2   | 2   |     |   |
| RSAU_002128 | 26077 | 22933 | 21639 | 1161 | 4200 | 95449 | 151 | 118 | 125 | 6133 | 7049 | 8706 | 5399 | 12971 | 18743 | 11418 | 11353 | 13516 | 56   | 65  | 80  | 50  | 120 | 173 | 105 | 105 | 125 | 125 |     |   |
| RSAU_002129 | 887   | 605   | 396   | 27   | 25   | 44    | 1   | 1   | 4   | 221  | 198  | 169  | 133  | 82    | 91    | 80    | 102   | 460   | 2    | 2   | 1   | 1   | 1   | 1   | 1   | 1   | 1   | 4   |     |   |
| RSAU_002130 | 481   | 307   | 281   | 14   | 12   | 15    | 0   | 0   | 0   | 52   | 44   | 52   | 30   | 17    | 13    | 0     | 0     | 202   | 1    | 1   | 1   | 1   | 0   | 0   | 0   | 0   | 0   | 0   |     |   |
| RSAU_002131 | 1208  | 822   | 649   | 31   | 40   | 66    | 8   | 4   | 1   | 50   | 45   | 46   | 25   | 21    | 23    | 107   | 68    | 19    | 3    | 2   | 2   | 1   | 1   | 1   | 1   | 6   | 4   | 1   |     |   |
| RSAU_002132 | 2231  | 1520  | 1436  | 116  | 186  | 136   | 1   | 1   | 0   | 225  | 201  | 246  | 223  | 131   | 116   | 32    | 62    | 418   | 5    | 4   | 5   | 3   | 2   | 1   | 2   | 1   | 0   | 9   |     |   |
| RSAU_002133 | 4437  | 2158  | 1625  | 58   | 87   | 79    | 7   | 0   | 0   | 258  | 165  | 162  | 66   | 66    | 38    | 131   | 0     | 10    | 6    | 6   | 3   | 2   | 1   | 5   | 0   | 0   | 0   | 0   |     |   |
| RSAU_002134 | 7451  | 4074  | 2664  | 179  | 234  | 350   | 9   | 7   | 5   | 562  | 403  | 344  | 266  | 232   | 220   | 218   | 216   | 173   | 16   | 11  | 10  | 8   | 7   | 6   | 6   | 6   | 5   | 4   |     |   |
| RSAU_002135 | 211   | 103   | 100   | 29   | 41   | 47    | 0   | 0   | 0   | 40   | 26   | 33   | 110  | 104   | 75    | 0     | 0     | 355   | 0    | 0   | 0   | 1   | 1   | 1   | 1   | 0   | 0   | 0   |     |   |
| RSAU_002136 | 1991  | 1722  | 1279  | 1977 | 3689 | 5317  | 32  | 37  | 34  | 324  | 368  | 357  | 6384 | 7699  | 7249  | 1680  | 2472  | 2553  | 4    | 5   | 5   | 85  | 103 | 96  | 22  | 33  | 34  | 34  |     |   |
| RSAU_002137 | 3434  | 2940  | 2745  | 170  | 289  | 373   | 14  | 13  | 5   | 294  | 330  | 400  | 287  | 325   | 287   | 386   | 456   | 197   | 7    | 8   | 10  | 4   | 8   | 7   | 10  | 12  | 5   | 5   |     |   |
| RSAU_002138 | 126   | 43    | 55    | 13   | 9    | 11    | 0   | 0   | 0   | 3    | 18   | 8    | 13   | 37    | 17    | 13    | 0     | 0     | 204  | 0   | 0   | 0   | 1   | 0   | 0   | 0   | 0   | 0   | 0   |   |
| RSAU_002139 | 0     | 0     | 0     | 0    | 0    | 0     | 0   | 0   | 0   | 0    | 0    | 0    | 0    | 0     | 0     | 0     | 0     | 0     | 0    | 0   | 0   | 0   | 0   | 0   | 0   | 0   | 0   | 0   | 0   |   |
| RSAU_002140 | 0     | 0     | 0     | 0    | 0    | 0     | 0   | 0   | 0   | 0    | 0    | 0    | 0    | 0     | 0     | 0     | 0     | 0     | 0    | 0   | 0   | 0   | 0   | 0   | 0   | 0   | 0   | 0   | 0   |   |
| RSAU_002141 | 0     | 0     | 0     | 0    | 0    | 0     | 0   | 0   | 0   | 0    | 0    | 0    | 0    | 0     | 0     | 0     | 0     | 0     | 0    | 0   | 0   | 0   | 0   | 0   | 0   | 0   | 0   | 0   | 0   |   |
| RSAU_002142 | 0     | 0     | 0     | 0    | 0    | 0     | 0   | 0   | 0   | 0    | 0    | 0    | 0    | 0     | 0     | 0     | 0     | 0     | 0    | 0   | 0   | 0   | 0   | 0   | 0   | 0   | 0   | 0   | 0   |   |
| RSAU_002143 | 2928  | 2263  | 1930  | 102  | 179  | 233   | 7   | 6   | 6   | 212  | 215  | 240  | 146  | 171   | 141   | 163   | 178   | 200   | 7    | 6   | 7   | 4   | 5   | 4   | 5   | 5   | 6   | 6   |     |   |
| RSAU_002144 | 4092  | 4601  | 2731  | 52   | 91   | 92    | 1   | 0   | 9   | 430  | 634  | 492  | 107  | 125   | 80    | 3     | 435   | 9     | 13   | 10  | 2   | 3   | 2   | 1   | 0   | 0   | 1   | 0   |     |   |
| RSAU_002145 | 1108  | 681   | 485   | 42   | 63   | 50    | 0   | 0   | 0   | 191  | 147  | 137  | 142  | 142   | 72    | 0     | 79    | 2     | 2    | 2   | 2   | 2   | 2   | 1   | 0   | 0   | 0   | 1   |     |   |
| RSAU_002146 | 6373  | 3757  | 2734  | 212  | 344  | 404   | 12  | 7   | 5   | 176  | 210  | 129  | 119  | 125   | 92    | 106   | 136   | 19    | 11   | 11  | 12  | 10  | 16  | 5   | 8   | 8   | 4   | 2   |     |   |
| RSAU_002147 | 1567  | 1120  | 866   | 127  | 200  | 273   | 7   | 7   | 1   | 133  | 125  | 126  | 214  | 224   | 194   | 192   | 244   | 39    | 3    | 3   | 3   | 5   | 6   | 5   | 5   | 6   | 1   | 1   |     |   |
| RSAU_002148 | 1475  | 1056  | 840   | 105  | 159  | 323   | 7   | 10  | 5   | 151  | 141  | 147  | 212  | 214   | 274   | 230   | 419   | 235   | 3    | 3   | 3   | 3   | 4   | 5   | 6   | 5   | 9   | 5   |     |   |
| RSAU_002149 | 301   | 230   | 196   | 51   | 67   | 132   | 2   | 0   | 1   | 37   | 35   | 39   | 118  | 103   | 130   | 75    | 144   | 54    | 1    | 1   | 1   | 1   | 2   | 2   | 1   | 3   | 1   | 1   |     |   |
| RSAU_002150 | 1033  | 695   | 617   | 37   | 61   | 127   | 37  | 8   | 1   | 114  | 101  | 112  | 382  | 97    | 117   | 117   | 117   | 117   | 2    | 2   | 2   | 2   | 2   | 2   | 2   | 2   | 3   | 3   |     |   |
| RSAU_002151 | 4036  | 3870  | 2430  | 93   | 100  | 130   | 6   | 7   | 8   | 355  | 475  | 389  | 171  | 123   | 101   | 180   | 288   | 344   | 9    | 11  | 9   | 4   | 3   | 2   | 4   | 6   | 8   | 8   |     |   |
| RSAU_002152 | 15845 | 15096 | 9768  | 484  | 631  | 1019  | 33  | 28  | 23  | 938  | 1172 | 991  | 565  | 491   | 504   | 629   | 679   | 627   | 34   | 43  | 36  | 21  | 18  | 18  | 23  | 25  | 23  | 23  |     |   |
| RSAU_002153 | 1116  | 1012  | 808   | 52   | 73   | 142   | 5   | 1   | 6   | 255  | 303  | 316  | 234  | 219   | 271   | 44    | 44    | 62    | 2    | 3   | 3   | 2   | 2   | 3   | 3   | 1   | 6   | 6   |     |   |
| RSAU_002154 | 246   | 145   | 126   | 1    | 1    | 12    | 0   | 0   | 0   | 108  | 83   | 94   | 8    | 23    | 47    | 0     | 0     | 1213  | 1    | 0   | 0   | 0   | 0   | 0   | 0   | 0   | 0   | 0   | 0   |   |
| RSAU_002155 | 543   | 311   | 287   | 42   | 54   | 2     | 0   | 0   | 1   | 6    | 108  | 83   | 94   | 8     | 23    | 47    | 0     | 0     | 1213 | 1   | 0   | 0   | 0   | 0   | 0   | 0   | 0   | 0   | 0   | 0 |
| RSAU_002156 | 358   | 324   | 225   | 55   | 74   | 91    | 0   | 4   | 1   | 31   | 37   | 34   | 96   | 86    | 67    | 0     | 145   | 40    | 1    | 1   | 1   | 2   | 2   | 2   | 2   | 4   | 1   | 1   |     |   |
| RSAU_002157 | 170   | 75    | 56    | 3    | 23   | 9     | 0   | 1   | 0   | 26   | 15   | 14   | 9    | 46    | 11    | 0     | 63    | 0     | 0    | 0   | 0   | 0   | 0   | 0   | 0   | 0   | 0   | 0   | 0   |   |
| RSAU_002158 | 433   | 263   | 191   | 46   | 69   | 87    | 5   | 1   | 1   | 22   | 17   | 16   | 46   | 46    | 37    | 81    | 20    | 23    | 1    | 1   | 1   | 2   | 2   | 2   | 3   | 1   | 1   | 1   |     |   |
| RSAU_002159 | 139   | 109   | 71    | 25   | 62   | 93    | 2   | 2   | 0   | 14   | 15   | 12   | 32   | 37    | 83    | 0     | 67    | 0     | 0    | 0   | 0   | 0   | 0   | 0   | 0   | 0   | 0   | 0   | 0   |   |
| RSAU_002160 | 3165  | 2149  | 1476  | 111  | 130  | 283   | 16  | 10  | 9   | 510  | 454  | 407  | 353  | 275   | 381   | 830   | 660   | 667   | 7    | 6   | 6   | 5   | 4   | 5   | 11  | 9   | 9   | 9   |     |   |
| RSAU_002161 | 1273  | 697   | 463   | 32   | 46   | 62    | 2   | 3   | 0   | 76   | 54   | 47   | 37   | 36    | 31    | 38    | 73    | 0     | 3    | 2   | 2   | 1   | 1   | 1   | 1   | 3   | 0   | 0   | 0   |   |
| RSAU_002162 | 283   | 212   | 170   | 48   | 75   | 80    | 5   | 2   | 0   | 40   | 39   | 41   | 135  | 141   | 115   | 95    | 230   | 117   | 0    | 1   | 1   | 1   | 2   | 2   | 1   | 3   | 2   | 0   | 0   |   |
| RSAU_002163 | 917   | 981   | 724   | 459  | 498  | 787   | 12  | 5   | 5   | 84   | 119  | 114  | 839  | 606   | 609   | 358   | 199   | 213   | 2    | 3   | 3   | 20  | 14  | 14  | 8   | 4   | 5   | 5   |     |   |
| RSAU_002164 | 295   | 218   | 138   | 67   | 67   | 67    | 0   | 0   | 0   | 21   | 21   | 21   | 21   | 21    | 21    | 21    | 21    | 21    | 21   | 21  | 21  | 21  | 21  | 21  | 21  | 21  | 21  | 21  | 21  |   |
| RSAU_002165 | 292   | 309   | 217   | 13   | 36   | 44    | 0   | 0   | 0   | 19   | 26   | 24   | 16   | 31    | 24    | 0     | 0     | 0     | 0    | 1   | 1   | 1   | 1   | 1   | 1   | 0   | 0   | 0   | 0   |   |
| RSAU_002166 | 458   | 338   | 336   | 30   | 58   | 103   | 2   | 2   | 1   | 22   | 21   | 28   | 29   | 37    | 42    | 31    | 40    | 22    | 1    | 1   | 1   | 1   | 2   | 2   | 1   | 2   | 1   | 1   | 1   |   |
| RSAU_002167 | 174   | 130   | 136   | 53   | 77   | 144   | 6   | 3   | 7   | 16   | 15   | 21   | 96   | 93    | 111   | 178   | 264   | 127   | 0    | 0   | 1   | 2   | 2   | 2   | 3   | 4   | 6   | 3   |     |   |
| RSAU_002168 | 334   | 5450  | 3260  | 615  | 679  | 1086  | 32  | 13  | 6   | 564  | 623  | 430  | 1009 | 776   | 734   | 899   | 454   | 723   | 14   | 16  | 12  | 26  | 19  | 18  | 22  | 12  | 18  | 18  |     |   |
| RSAU_002169 | 1348  | 891   | 736   | 106  | 126  | 157   | 5   | 2   | 4   | 87   | 75   | 81   | 136  | 107   | 85    | 103   | 53    | 119   | 3    | 2   | 3   | 5   | 4   | 3   | 3   | 3   | 2   | 3   | 2   |   |
| RSAU_002170 | 812   | 559   | 377   | 39   | 79   | 69    | 3   | 3   | 1   | 96   | 87   | 76   | 91   | 123   | 68    | 114   | 146   | 54    | 2    | 1   | 1   | 2   | 2   | 1   | 2   | 3   | 1   | 1   | 1   |   |
| RSAU_002171 | 1162  | 933   | 842   | 135  | 177  | 305   | 12  | 9   | 5   | 145  | 152  | 180  | 332  | 290   | 318   | 482   | 460   | 287   | 2    | 3   | 3   | 6   | 5   | 5   | 8   | 8   | 5   | 5   |     |   |
| RSAU_002172 | 1929  | 1557  | 1018  | 50   | 68   | 164   | 8   | 7   | 7   | 154  | 163  | 139  | 79   | 71    | 109   | 128   | 98    | 258   | 4    | 4   | 4   | 2   | 2   | 3   | 3   | 3   | 3   | 3   |     |   |
| RSAU_002173 | 1403  | 2114  | 1476  | 64   | 64   | 404   | 1   | 0   | 0   | 142  | 146  | 146  | 146  | 146   | 146   | 146   | 146   | 146   | 146  | 146 | 146 | 146 | 146 | 146 | 146 | 146 | 146 | 146 | 146 |   |
| RSAU_002174 | 729   | 522   | 279   | 21   | 42   | 39    | 1   | 1   | 2   | 48   | 45   | 29   | 27   | 36    | 21    | 27    | 61    | 2     | 2    | 1   | 1   | 1   | 1   | 1   | 1   | 1   | 1   | 1   | 1   |   |
| RSAU_002175 | 264   | 80    | 61    | 22   | 26   | 70    | 0   | 0   | 0   | 0    | 23   | 9    | 9    | 39    | 31    | 53    | 0     | 0     | 0    | 0   | 0   | 0   | 0   | 0   | 0   | 0   | 0   | 0   | 0   |   |
| RSAU_002176 | 438   | 326   | 227   | 45   | 85   | 182   | 0   | 0   | 1   | 55   | 53   | 49   | 112  | 140   | 91    | 0     | 51    | 58    | 1    | 1   | 1   | 1   | 2   | 2   | 3   | 0   | 1   | 1   | 1   |   |
| RSAU_002177 | 3156  | 3288  | 395   | 20   | 41   | 37    | 3   | 0   | 0   | 41   | 68   | 11   | 32   | 97    | 83    | 0     | 52    | 129   | 0    | 0   | 0   | 0   | 0   | 0   | 0   | 0   | 0   | 0   | 0   |   |
| RSAU_002178 | 2705  | 2157  | 1479  | 16   | 21   | 31    | 1   | 6   | 0   | 182  | 191  | 171  | 21   | 18    | 17    | 21    | 166   |       |      |     |     |     |     |     |     |     |     |     |     |   |

|             |      |       |      |     |      |      |     |     |     |      |       |      |      |      |       |       |       |      |    |    |     |     |     |     |     |     |    |
|-------------|------|-------|------|-----|------|------|-----|-----|-----|------|-------|------|------|------|-------|-------|-------|------|----|----|-----|-----|-----|-----|-----|-----|----|
| RSAU_002272 | 2788 | 3208  | 2415 | 294 | 582  | 764  | 10  | 16  | 23  | 199  | 300   | 295  | 414  | 547  | 496   | 230   | 468   | 757  | 6  | 9  | 9   | 13  | 17  | 14  | 7   | 14  | 23 |
| RSAU_002273 | 2828 | 2443  | 2097 | 346 | 655  | 906  | 21  | 17  | 15  | 350  | 396   | 444  | 845  | 1066 | 937   | 837   | 862   | 855  | 6  | 7  | 8   | 15  | 19  | 16  | 15  | 15  | 15 |
| RSAU_002274 | 1512 | 1234  | 972  | 71  | 57   | 136  | 5   | 1   | 6   | 95   | 81    | 77   | 94   | 52   | 77    | 84    | 71    | 241  | 3  | 4  | 3   | 2   | 3   | 4   | 3   | 0   |    |
| RSAU_002275 | 1939 | 2198  | 1075 | 26  | 50   | 62   | 0   | 0   | 0   | 334  | 496   | 317  | 88   | 113  | 89    | 0     | 0     | 0    | 4  | 6  | 4   | 1   | 1   | 1   | 0   | 0   | 0  |
| RSAU_002276 | 1343 | 1415  | 965  | 81  | 70   | 166  | 20  | 5   | 3   | 167  | 230   | 205  | 198  | 114  | 172   | 801   | 254   | 171  | 3  | 4  | 4   | 3   | 2   | 3   | 14  | 4   | 3  |
| RSAU_002277 | 237  | 177   | 96   | 57  | 94   | 151  | 9   | 6   | 3   | 23   | 22    | 16   | 111  | 122  | 124   | 286   | 242   | 136  | 1  | 1  | 0   | 0   | 2   | 3   | 6   | 5   | 3  |
| RSAU_002278 | 276  | 216   | 131  | 44  | 51   | 57   | 1   | 0   | 1   | 15   | 16    | 14   | 51   | 30   | 30    | 27    | 0     | 26   | 0  | 0  | 0   | 0   | 0   | 0   | 0   | 0   | 0  |
| RSAU_002279 | 615  | 450   | 410  | 129 | 155  | 343  | 3   | 2   | 4   | 24   | 24    | 23   | 100  | 80   | 112   | 37    | 32    | 72   | 1  | 1  | 2   | 6   | 4   | 6   | 2   | 2   | 4  |
| RSAU_002280 | 2101 | 1820  | 1506 | 75  | 98   | 201  | 7   | 6   | 8   | 93   | 106   | 115  | 66   | 57   | 75    | 100   | 109   | 164  | 5  | 5  | 5   | 3   | 3   | 4   | 5   | 5   | 8  |
| RSAU_002281 | 449  | 251   | 241  | 40  | 69   | 97   | 2   | 2   | 2   | 24   | 17    | 22   | 43   | 49   | 44    | 35    | 44    | 50   | 1  | 1  | 1   | 2   | 2   | 2   | 2   | 2   | 2  |
| RSAU_002282 | 5616 | 4605  | 5096 | 269 | 472  | 703  | 41  | 19  | 17  | 538  | 579   | 934  | 509  | 595  | 563   | 1266  | 746   | 750  | 12 | 13 | 21  | 12  | 13  | 13  | 29  | 17  | 17 |
| RSAU_002283 | 1575 | 1234  | 972  | 71  | 57   | 136  | 5   | 1   | 6   | 137  | 141   | 139  | 61   | 82   | 77    | 84    | 71    | 241  | 3  | 4  | 3   | 2   | 3   | 4   | 3   | 0   |    |
| RSAU_002284 | 2432 | 1818  | 1625 | 225 | 266  | 429  | 9   | 9   | 3   | 141  | 139   | 162  | 259  | 204  | 209   | 169   | 215   | 80   | 5  | 5  | 6   | 10  | 8   | 6   | 6   | 8   | 3  |
| RSAU_002285 | 436  | 440   | 309  | 25  | 33   | 52   | 0   | 4   | 0   | 51   | 67    | 62   | 57   | 50   | 51    | 0     | 192   | 0    | 1  | 1  | 1   | 1   | 1   | 1   | 0   | 4   | 0  |
| RSAU_002286 | 267  | 167   | 202  | 43  | 78   | 66   | 1   | 0   | 0   | 23   | 18    | 30   | 73   | 88   | 47    | 27    | 0     | 0    | 1  | 0  | 1   | 2   | 2   | 1   | 1   | 0   | 0  |
| RSAU_002287 | 59   | 66    | 54   | 15  | 34   | 33   | 2   | 1   | 1   | 7    | 11    | 51   | 38   | 37   | 35    | 82    | 52    | 59   | 0  | 0  | 0   | 0   | 0   | 1   | 1   | 1   | 1  |
| RSAU_002288 | 1227 | 101   | 98   | 80  | 98   | 138  | 2   | 1   | 3   | 8    | 8     | 8    | 8    | 82   | 74    | 41    | 41    | 26   | 88 | 0  | 0   | 0   | 0   | 3   | 3   | 1   | 3  |
| RSAU_002289 | 3007 | 3411  | 2355 | 322 | 453  | 913  | 18  | 11  | 19  | 409  | 609   | 546  | 865  | 811  | 1039  | 789   | 613   | 1191 | 7  | 10 | 9   | 14  | 13  | 16  | 13  | 10  | 19 |
| RSAU_002290 | 583  | 408   | 486  | 178 | 203  | 397  | 15  | 6   | 8   | 29   | 26    | 41   | 175  | 133  | 165   | 240   | 122   | 183  | 1  | 1  | 2   | 8   | 6   | 7   | 11  | 5   | 8  |
| RSAU_002291 | 7422 | 9951  | 7868 | 937 | 1358 | 2321 | 51  | 67  | 56  | 446  | 788   | 814  | 1116 | 1078 | 1171  | 991   | 1658  | 1557 | 16 | 28 | 29  | 40  | 39  | 42  | 35  | 59  | 56 |
| RSAU_002292 | 1556 | 1105  | 892  | 49  | 55   | 101  | 6   | 7   | 0   | 107  | 99    | 115  | 66   | 50   | 58    | 132   | 197   | 0    | 3  | 3  | 4   | 2   | 2   | 4   | 6   | 0   |    |
| RSAU_002293 | 261  | 202   | 173  | 13  | 14   | 18   | 1   | 0   | 0   | 27   | 27    | 31   | 26   | 19   | 15    | 33    | 43    | 0    | 1  | 1  | 1   | 1   | 0   | 0   | 1   | 1   | 0  |
| RSAU_002294 | 593  | 175   | 143  | 13  | 14   | 11   | 0   | 0   | 0   | 73   | 28    | 30   | 31   | 22   | 11    | 0     | 0     | 0    | 1  | 0  | 1   | 1   | 0   | 0   | 0   | 0   | 0  |
| RSAU_002295 | 5296 | 4901  | 4258 | 110 | 184  | 321  | 13  | 11  | 1   | 401  | 487   | 553  | 164  | 183  | 203   | 317   | 341   | 139  | 11 | 14 | 16  | 5   | 6   | 9   | 10  | 10  | 4  |
| RSAU_002296 | 793  | 352   | 360  | 39  | 51   | 126  | 13  | 1   | 2   | 251  | 146   | 141  | 243  | 254  | 333   | 101   | 129   | 291  | 2  | 1  | 2   | 2   | 2   | 2   | 2   | 1   | 1  |
| RSAU_002297 | 1644 | 1403  | 1272 | 171 | 340  | 1640 | 14  | 13  | 2   | 340  | 429   | 540  | 822  | 814  | 807   | 986   | 165   | 10   | 7  | 10 | 10  | 12  | 12  | 10  | 12  | 2   | 2  |
| RSAU_002298 | 892  | 606   | 565  | 63  | 106  | 112  | 1   | 3   | 1   | 46   | 41    | 50   | 64   | 72   | 48    | 16    | 63    | 23   | 2  | 2  | 2   | 3   | 2   | 1   | 3   | 1   | 1  |
| RSAU_002299 | 126  | 95    | 53   | 14  | 25   | 42   | 0   | 0   | 0   | 13   | 13    | 9    | 30   | 35   | 38    | 0     | 0     | 0    | 0  | 0  | 0   | 1   | 1   | 1   | 0   | 0   | 0  |
| RSAU_002300 | 768  | 586   | 605  | 80  | 189  | 239  | 9   | 11  | 0   | 52   | 50    | 70   | 108  | 170  | 136   | 198   | 308   | 0    | 2  | 2  | 2   | 3   | 5   | 4   | 6   | 10  | 4  |
| RSAU_002301 | 4789 | 3657  | 4030 | 401 | 328  | 562  | 12  | 15  | 1   | 477  | 478   | 688  | 789  | 439  | 486   | 353   | 613   | 505  | 11 | 10 | 15  | 17  | 9   | 10  | 8   | 13  | 11 |
| RSAU_002302 | 550  | 378   | 423  | 81  | 164  | 235  | 12  | 5   | 4   | 55   | 49    | 72   | 160  | 216  | 196   | 386   | 205   | 184  | 1  | 1  | 1   | 2   | 3   | 5   | 4   | 8   | 4  |
| RSAU_002303 | 316  | 241   | 243  | 39  | 60   | 124  | 2   | 1   | 1   | 29   | 29    | 39   | 72   | 74   | 97    | 60    | 38    | 43   | 1  | 1  | 1   | 2   | 2   | 2   | 1   | 1   | 1  |
| RSAU_002304 | 450  | 372   | 256  | 108 | 173  | 296  | 6   | 3   | 10  | 39   | 42    | 38   | 186  | 198  | 216   | 168   | 107   | 402  | 1  | 1  | 1   | 5   | 5   | 5   | 4   | 3   | 10 |
| RSAU_002305 | 1679 | 1466  | 1039 | 590 | 1503 | 1632 | 35  | 36  | 30  | 85   | 98    | 90   | 595  | 1010 | 697   | 576   | 753   | 705  | 4  | 4  | 4   | 25  | 43  | 30  | 24  | 32  | 30 |
| RSAU_002306 | 440  | 372   | 256  | 108 | 173  | 296  | 6   | 3   | 10  | 39   | 42    | 38   | 186  | 198  | 216   | 168   | 107   | 402  | 1  | 1  | 1   | 5   | 5   | 5   | 4   | 3   | 10 |
| RSAU_002307 | 1000 | 176   | 139  | 238 | 471  | 734  | 16  | 13  | 5   | 39   | 23    | 23   | 468  | 618  | 618   | 514   | 531   | 229  | 1  | 1  | 1   | 10  | 13  | 10  | 11  | 12  | 5  |
| RSAU_002308 | 428  | 140   | 149  | 225 | 280  | 486  | 11  | 7   | 12  | 42   | 18    | 18   | 441  | 366  | 403   | 352   | 285   | 549  | 1  | 0  | 0   | 10  | 8   | 9   | 8   | 6   | 12 |
| RSAU_002309 | 1864 | 1326  | 1438 | 180 | 173  | 268  | 5   | 8   | 3   | 198  | 185   | 261  | 378  | 242  | 238   | 171   | 348   | 146  | 4  | 4  | 5   | 8   | 5   | 5   | 3   | 7   | 3  |
| RSAU_002310 | 4789 | 3657  | 4030 | 401 | 328  | 562  | 12  | 15  | 1   | 477  | 478   | 688  | 789  | 439  | 486   | 353   | 613   | 505  | 11 | 10 | 15  | 17  | 9   | 10  | 8   | 13  | 11 |
| RSAU_002311 | 983  | 950   | 942  | 162 | 208  | 275  | 9   | 3   | 5   | 52   | 66    | 44   | 169  | 145  | 122   | 153   | 65    | 122  | 2  | 3  | 2   | 7   | 6   | 5   | 6   | 3   | 5  |
| RSAU_002312 | 2886 | 3415  | 1423 | 46  | 120  | 138  | 3   | 2   | 9   | 557  | 865   | 471  | 175  | 304  | 222   | 186   | 158   | 800  | 6  | 10 | 5   | 2   | 3   | 2   | 2   | 2   | 9  |
| RSAU_002313 | 63   | 42    | 23   | 4   | 5    | 8    | 2   | 0   | 0   | 12   | 10    | 7    | 15   | 12   | 13    | 127   | 0     | 0    | 0  | 0  | 0   | 0   | 0   | 0   | 1   | 0   | 0  |
| RSAU_002314 | 126  | 82    | 48   | 5   | 12   | 24   | 0   | 1   | 2   | 24   | 21    | 16   | 19   | 30   | 38    | 0     | 80    | 0    | 0  | 0  | 0   | 0   | 0   | 0   | 0   | 1   | 0  |
| RSAU_002315 | 314  | 215   | 180  | 26  | 31   | 40   | 0   | 0   | 0   | 61   | 61    | 64   | 90   | 94   | 68    | 165   | 125   | 79   | 1  | 1  | 1   | 1   | 1   | 1   | 6   | 14  | 4  |
| RSAU_002316 | 592  | 612   | 614  | 72  | 135  | 162  | 5   | 4   | 1   | 114  | 155   | 203  | 274  | 343  | 261   | 311   | 316   | 88   | 1  | 2  | 2   | 3   | 4   | 3   | 4   | 1   | 1  |
| RSAU_002317 | 1927 | 2086  | 2025 | 123 | 241  | 282  | 17  | 7   | 11  | 226  | 321   | 407  | 285  | 372  | 276   | 642   | 336   | 594  | 4  | 6  | 8   | 5   | 7   | 5   | 12  | 6   | 11 |
| RSAU_002318 | 2667 | 2107  | 1052 | 123 | 164  | 248  | 9   | 1   | 0   | 772  | 800   | 522  | 703  | 625  | 600   | 839   | 118   | 0    | 6  | 6  | 5   | 5   | 5   | 5   | 6   | 1   | 0  |
| RSAU_002319 | 6748 | 16266 | 9632 | 608 | 1995 | 6975 | 205 | 128 | 278 | 4168 | 10211 | 6668 | 5754 | 5247 | 28645 | 22321 | 54484 | 7026 | 56 | 36 | 148 | 113 | 278 | 148 | 113 | 278 |    |
| RSAU_002320 | 524  | 403   | 310  | 35  | 70   | 53   | 2   | 3   | 0   | 56   | 56    | 66   | 74   | 98   | 47    | 69    | 131   | 0    | 1  | 1  | 1   | 2   | 1   | 1   | 1   | 3   | 0  |
| RSAU_002321 | 170  | 90    | 91   | 25  | 59   | 69   | 3   | 0   | 0   | 48   | 33    | 44   | 140  | 220  | 163   | 274   | 0     | 0    | 0  | 0  | 0   | 1   | 2   | 1   | 2   | 0   | 0  |
| RSAU_002322 | 200  | 180   | 180  | 41  | 71   | 102  | 0   | 2   | 6   | 49   | 58    | 68   | 202  | 233  | 213   | 0     | 204   | 690  | 0  | 1  | 1   | 2   | 2   | 2   | 2   | 0   | 6  |
| RSAU_002323 | 876  | 657   | 700  | 121 | 210  | 315  | 4   | 7   | 3   | 53   | 53    | 73   | 147  | 170  | 162   | 79    | 176   | 85   | 2  | 2  | 3   | 5   | 6   | 6   | 3   | 6   | 3  |
| RSAU_002324 | 644  | 451   | 445  | 67  | 61   | 73   | 0   | 0   | 0   | 24   | 73    | 67   | 156  | 158  | 158   | 219   | 139   | 104  | 1  | 1  | 1   | 1   | 1   | 1   | 1   | 1   | 1  |
| RSAU_002325 | 384  | 245   | 222  | 29  | 66   | 76   | 2   | 0   | 0   | 39   | 33    | 39   | 59   | 89   | 65    | 66    | 0     | 0    | 0  | 1  | 1   | 1   | 2   | 1   | 1   | 0   | 0  |
| RSAU_002326 | 230  | 158   | 133  | 8   | 11   | 33   | 5   | 0   | 6   | 32   | 29    | 32   | 22   | 20   | 39    | 230   | 0     | 396  | 1  | 0  | 1   | 0   | 1   | 0   | 1   | 3   | 0  |
| RSAU_002327 | 1552 | 709   | 609  | 39  | 81   | 172  | 14  | 9   | 9   | 98   | 58    | 65   | 48   | 67   | 90    | 284   | 233   | 261  | 3  | 2  | 2   | 2   | 2   | 3   | 10  | 8   | 9  |
| RSAU_002328 | 260  | 122   | 117  | 28  | 25   | 34   | 0   | 3   | 1   | 27   | 13    | 20   | 50   | 288  | 128   | 48    | 0     | 0    | 0  | 0  | 0   | 0   | 1   | 1   | 1   | 1   | 1  |
| RSAU_002329 | 88   | 70    | 38   | 2   | 14   | 11   | 3   | 0   | 0   | 27   | 28    | 20   | 12   | 56   | 28    | 299   | 0     | 0    | 0  | 0  | 0   | 0   | 0   | 0   | 0   | 2   | 0  |
| RSAU_002330 | 529  | 371   | 428  | 30  | 55   | 84   | 1   | 2   | 0   | 55   | 51    | 77   | 62   | 76   | 73    | 86    | 0     | 0    | 1  | 1  | 2   | 1   | 2   | 2   | 1   | 2   | 0  |
| RSAU_002331 | 410  | 271   | 311  | 21  | 27   | 51   | 2   | 2   | 1   | 44   | 38    |      |      |      |       |       |       |      |    |    |     |     |     |     |     |     |    |
