# Supplementary material for: High-Resolution Transcriptomic Analysis of the Adaptive Response of Staphylococcus aureus during Acute and Chronic Phases of Osteomyelitis
Source: PubMed Central journal article supplement — mBio. 2014 Dec 23;5(6):e01775-14. doi: 10.1128/mBio.01775-14 (PMC4278534; doi:10.1128/mbio.01775-14), 2014-12-23
Supplement: mbo006142096st8.pdf [file mbo006142096st8.pdf]

**TABLE S8** Primers used for RT-PCR

| <b>Primer target</b>                                       | <b>Primer</b>        | <b>Primer sequence (5'-3')</b>                       |
|------------------------------------------------------------|----------------------|------------------------------------------------------|
| Accessory gene regulator A                                 | argA_for<br>argA_rev | TACAAAGTTGCAGCGATGGAT<br>TGGGCAATGAGTCTGTGAGAT       |
| Zinc metalloproteinase aureolysin Au                       | aur_for<br>aur_rev   | AGCGTCTCCCTCTTTTCCAG<br>GCATGGATCGGTGACAAAAT         |
| Guanosine monophosphate kinase                             | gmk_for<br>gmk_rev   | CGTTTTATCAGGACCATCTGGA<br>CTACGCCATCAACTTCACCTTC     |
| Catalase                                                   | katA_for<br>katA_for | TGTAGCAGGAGAACGTGGTG<br>CCGTCCAGAAATCCCAGTTA         |
| Truncated MHC class II analog prote                        | map_for<br>map_rev   | AGGACAAACTACCGGCAACTC<br>TGCCATCTTTCCAAGTAATCG       |
| Staphylokinase precursor                                   | sak_for<br>sak_rev   | GTGACTGGAGTTGATGGTAAAGGA<br>GCTCTGATAAATCTGGGACAACAA |
| Triosephosphate isomerase                                  | tpiA_for<br>tpiA_rev | GACGAAGAGCGTGAAAGTGG<br>CAGTTCCGATTGCCAGAT           |
| Arginine deiminase                                         | adi_for<br>adi_rev   | TTCATCGCCGCCTTCAATA<br>GCACGACGACGAGAATCAA           |
| Carbamate kinase ArcC2                                     | arcC_for<br>arcC_rev | CGTATGCCTGCTCTAAATTGGTA<br>CTATGAAGGTGTTGAAGCGGTTA   |
| Clumping factor A                                          | clfA_for<br>clfA_rev | GCACAACAGGAAACGACACA<br>TCCTCCGCATTTGTATTGCT         |
| Chaperone protein DnaK                                     | dnaK_for<br>dnaK_rev | AACGCCACCTTGGATTGC<br>GCTGGTGAAAACGGTCCA             |
| Mn2 ABC transporter substrate-binding lipoprotein putative | mn_for<br>mn_rev     | CCATGCGTGTGGATCTTGTT<br>TTGGTGGAGACAACGTCGAT         |
| L-lactate dehydrogenase                                    | ldh1_for<br>ldh1_rev | AACATGCCACACCATATTCTCC<br>GTGTTTCTCCAGGTTTTTGTGC     |
| Cysteine protease Staphopain B precursor putative          | sspB_for<br>sspB_rev | TGTGGGTCATTAGGGTTTTGAG<br>TCATGGTGTGCAGGATTCAGTA     |
| DNA gyrase B subunit                                       | gyrB_for<br>gyrB_rev | ACGCAGGCGATTTTACCAT<br>CATCCACATCGGCATCAGT           |
